# Supplementary material for: High-Throughput Engineering of Nonribosomal Extension Modules
Source: PubMed Central journal article supplement (PMC10728897; doi:10.1021/acschembio.3c00506), 2023-11-20
Supplement: cb3c00506_si_001.pdf [file cb3c00506_si_001.pdf]

## Supplementary Information

### **High-Throughput engineering of nonribosomal extension modules**

Anna Camus, Maximilian Gantz and Donald Hilvert\*

*Laboratory of Organic Chemistry, ETH Zurich, 8093 Zurich, Switzerland*

\*Correspondence to: [hilvert@org.chem.ethz.ch](mailto:hilvert@org.chem.ethz.ch)

#### **Table of Contents**

|                                                                      |    |
|----------------------------------------------------------------------|----|
| Materials and methods .....                                          | 2  |
| Molecular cloning .....                                              | 2  |
| Production of tyrocidine synthetase proteins in <i>E. coli</i> ..... | 5  |
| Protein purification .....                                           | 5  |
| Supplementary figures .....                                          | 7  |
| Protein sequences.....                                               | 14 |
| DNA sequences.....                                                   | 17 |
| References.....                                                      | 27 |

## Materials and methods

All chemicals were purchased from Sigma Aldrich and enzymes from NEB unless otherwise stated. Primers (Table S1) were synthesized by Microsynth AG (Switzerland). Propargyl glycine was obtained from Bachem, whereas 4-propargyloxy phenylalanine was synthesized as described by Kries et al.<sup>1</sup> Media and buffer components, kits, and enzymes were used as received from specified commercial suppliers. Expression media and buffers were prepared using purified H<sub>2</sub>O (Nanopure system, Barnstead).

### Molecular cloning

The plasmids pSU18His-TycA and pTrc99a-TycB1, which respectively encode the C-terminally His<sub>6</sub>-tagged TycA protein and the first module of TycB, were obtained from Grünewald et al.<sup>2</sup> Detailed descriptions of the construction of plasmids pSU18His-TycA, pSU18His-TycA<sub>pPhe</sub>, pTrc99a-TycB1SrfTE<sub>P26G</sub>, pTrc99a-TycB, pTrc99a-TycC, and pMG211-Sfp were reported previously.<sup>1,3,4</sup> Plasmid pCT302<sup>5</sup> was used for all yeast experiments but a NheI restriction site was replaced with an NdeI restriction site; the XhoI restriction site was also moved upstream of the c-myc tag, and all other XhoI sites were removed.<sup>6</sup> The cloning protocol for generating pCTRB-TycA A-T and pCTRB- W227S TycA A-T, which contains the W227S mutation, was previously described.<sup>3</sup>

PCRs were conducted using Phusion HF Polymerase (NEB) and GC buffer according to the supplier's protocol (10 µL GC buffer 50-100 ng DNA template, 0.5 µM primer, 0.2 mM dNTPs and 0.5 µL Phusion Polymerase in 50 µL total volume). PCR products were purified by 1% agarose gel electrophoresis and isolated using the Zymoclean™ Gel DNA Recovery Kit (Zymo Research). The resulting PCR products were digested with the appropriate restriction enzymes in CutSmart Buffer at 37 °C for 1 h followed by a purification step using DNA Clean & Concentrator-5 Kit (Zymo Research). The restriction digest of the vector backbone (pSU18-His or pTr99a or pCTRB) vectors was conducted as described for the inserts but the incubation time was increased to 4 h. The vector backbone was also gel-purified and extracted with the Zymoclean™ Gel DNA Recovery Kit (Zymo Research). The ligation of digested PCR products and vector backbone (at a 6:1 ratio, 20-60 ng vector backbone) was performed at room temperature for 15 min using T4 DNA ligase. The ligation product was purified using the DNA Clean & Concentrator-5 Kit, and the plasmid was transformed into electrocompetent *E. coli* HM0079 cells. 0.8 mL SOC medium (0.5% yeast extract, 2% tryptone, 10 mM NaCl, 2.5 mM MgCl<sub>2</sub>, 10 mM MgSO<sub>4</sub>, 20 mM glucose) was immediately added to the cells. The transformed cells were grown at 37 °C, 230 rpm for 1 h. 100 µL of the cell solution was plated on LB agar plates supplemented with the appropriate antibiotic (sodium ampicillin for pTrc99a and chloramphenicol for pSU18-His). 5 mL LB pre-cultures containing sodium ampicillin (100 µg/mL) or chloramphenicol (30 µg/mL) were inoculated with a single *E. coli* colony and incubated at 37 °C, 230 rpm overnight. A 1.5 mL culture was centrifuged at 21,000 x g. Plasmids were extracted using the ZR Plasmid Miniprep Pure kit (Zymo Research) and sequenced at Microsynth AG (Balgach Switzerland).

**Table S1: Primer list**

| <b>Primer</b> | <b>Primer sequence 5' to 3'</b>                    | <b>Application</b>   |
|---------------|----------------------------------------------------|----------------------|
| G79           | TGCTCCTGTTGCAGGCTTTCC                              | Cloning TycB variant |
| G80           | AAAGCCTGCAACAGGAGC                                 | Cloning TycB variant |
| G103          | GAGTGCCTGGTGGCCACCTACCTGCGAGATACAC                 | Cloning TycC variant |
| G112          | GCAAAGATCGCTCGAGATG                                | Cloning TycB variant |
| G114          | CTCTTTCATTGAGCTCCC                                 | Cloning TycB variant |
| G150          | AACATATCCGACACCGATGCGTC                            | Cloning TycB variant |
| G151          | ATCGGTGTCGGATATGTTTGGC                             | Cloning TycB variant |
| P4n           | TGGTGGTGGTTCTCATATGCACTTCAACGACACGGCC              | Cloning TycB variant |
| P6n           | ATAAGCTTTTGTTCCTCGAGAATGGCGGGCGCCGGCT              | Cloning TycB variant |
| P16n          | TGGTGGTGGTTCTCATATGTTCAACGGTGCGCACAAAG             | Cloning TycC variant |
| P18n          | ATAAGCTTTTGTTCCTCGAGGATCGGCACATACGTCTC             | Cloning TycC variant |
| P30           | CTCGAGGAACAAAAGCTTATT                              | Cloning TycC variant |
| P43           | CATATGAGAACCACCACCA                                | General cloning      |
| P44           | GCCTTCGATGCCTTTGCCNNKACTTTCTTTACGTTGATTG           | Library cloning      |
| P45           | GGCAAAGGCATCGAAGGC                                 | Library cloning      |
| P48           | GCTCCATCCAGGCAGTCNNKCTCGGGGGCGAAAAGC               | Library cloning      |
| P49           | GACTGCCTGGATGGAGC                                  | Library cloning      |
| P50           | CGACGGAGAGCAGCGTCNNKGCCACCTACCTGCGAGA              | Library cloning      |
| P51           | GACGCTGCTCTCCGTCG                                  | Library cloning      |
| P64           | TGGTGGTGGTTCTCATATGTTCAACGATACGCACAGAG             | Cloning TycB variant |
| P65           | ATA AGC TTT TGT TCC TCG AGG ACA CCC TGC TCG CTC TC | Cloning TycB variant |
| P87           | CCTTTGACGCTTTCGTTNNKTCCTTCTTTACGCCTGTGC            | Library cloning      |
| P88           | AACGAAAGCGTCAAAGG                                  | Library cloning      |
| P89           | CGATCTGGTCATCGTCAACNNKTACGGCCCCGACAGAAAG           | Library cloning      |
| P90           | GTTGACGATGACCAGATCG                                | Library cloning      |
| P91           | CGACAGAAAGCAGTGTCNNKGCCACCTGGCAGCGC                | Library cloning      |
| P92           | GACTGCTTTCTGTGTCG                                  | Library cloning      |
| P97           | TGGTGGTGGTTCTCATATGGAACAGGCAGCCGGCG                | Cloning TycB variant |
| P101          | TGGTGGTGGTTCTCATATGGCCAAAGGGAATGTCTTCTCG           | Cloning TycC variant |
| P104          | GCTGCTGGTGGCGTTCCTGGATACGCACAGAGAATACC             | Cloning TycB variant |
| P105          | GAACGCCACCAGCAGC                                   | Cloning TycB variant |
| P106          | GGTATCCACCCGCCTGCATGCGTCAGGCTGGACG                 | Cloning TycB variant |
| P107          | CAGGCGGGTGGATAACC                                  | Cloning TycB variant |

## **TycB variants**

pCTRB-TycB2 A-T: To generate the plasmid for yeast surface display of the A and T domains of the second module of TycB, two PCR fragments were generated using the primer pairs H32/P43, P4n/P6n and the template pTrc99a-TycB, respectively (Table S1).

TycB2 gene library: To create space to accommodate pPhe, residues L1704, M1768, and M1803 in the active site of the TycB2 A domain were randomized using NNK codons. Initially, five fragments were generated using pTRc99a-TycB as a template and the following primer pairs: H32/P43, P4n/P45, P44/P49, P48/P51 and P50/P6n. In a second step, the first three fragments were assembled using primers H32 and P49 and the last two fragments using primers P48 and P6n. In a third step, the two assembled products were connected by overlap PCR using H32 and P6n (Table S1). The PCR product was then transformed into freshly prepared electrocompetent yeast cells together with the pCTRB vector backbone as described below.

pCTRB-M1768A/M1803I-TycB2 A-T: this plasmid was isolated from yeast after sorting the TycB2 library (see Sequencing plasmids from homologous recombination or library clones)

pTrc99a-M1768A/M1803I-TycB: To introduce the mutations that confer pPhe specificity into the full-length TycB gene, two fragments were produced by PCR using the primer pairs G112/G79 and G80/G114 and pCTRB-M1768A/M1803I-TycB2 AT and pTrc99a-TycB as templates, respectively (Table 5). The two fragments were subsequently assembled by PCR. The purified and assembled PCR product was digested with XhoI and SacI and incubated for 1 h at 37 °C. The digested insert was purified using the Clean and Concentrator-5 kit (Zymo Research). The purified insert and the pTrc99a vector backbone were ligated using T4 DNA ligase in a ratio of 1:6 at 16 °C for 16 h. The ligated plasmid was purified using the Clean and Concentrator-5 kit (Zymo Research) and transformed by electroporation into electrocompetent HM0079 cells. The cells were resuspended in 800 µL SOC medium which contains 0.5% yeast extract, 2% tryptone, 10 mM NaCl, 2.5 mM MgCl<sub>2</sub>, 10 mM MgSO<sub>4</sub>, 20 mM glucose. The suspension was grown for 1 h at 37 °C and plated onto LB-agar plates containing 100 µg/mL ampicillin. The plates were incubated at 37 °C for 16 h. 3 mL LB Miller medium were inoculated with a single colony and incubated at 37 °C, 230 rpm for 16 h. The plasmid was isolated using the ZymoPURE™ Plasmid Miniprep Kit and sequenced by Microsynth AG (Switzerland). A 20% (w/v) glycerol stock of the culture containing the plasmid was prepared and stored at -80 °C.

pCTRB-W2742S-TycB3 A-T: To generate the plasmid for yeast surface display of the A and T domains of the third module of TycB containing the W2742S mutation, three PCR fragments were generated using the primer pairs H32/P43 (template: pCTRB-TycA A-T), P64/G150 (template: pTrc99a-TycB), and G151/P65 (template: pTrc99a-TycB) (Table S1).

pCTRB-TycB3 C-A-T: To generate the plasmid for yeast surface display of the C, A and T domains of the third module of TycB, three PCR fragments were generated using the primer pairs H32/P43 (template: pCTRB-TycA A-T), P97/P65 (template: pTrc99a-TycB), and P30/H33 (template: pCTRB-TycA A-T) (Table S1).

pCTRB-W2742S-TycB3 C-A-T: To generate the plasmid for yeast surface display of the C, A, and T domains of the third module of TycB containing the W2742S mutation, three PCR fragments were generated using the primer pairs H32/P105 (template: pCTRB-TycB3 C-A-T), P104/P107 (template: pTrc99a-W2742S-TycB), and P106/H33 (template: pCTRB-TycB3 C-A-T) (Table S1).

### **TycC variants**

pCTRB-TycC3 A-T: To generate the plasmid for yeast surface display of the A and T domains of the third module of TycC, two PCR fragments were generated using the primer pairs H32/P43 and P16n/P18n and the templates pCTRB-TycA A-T and pTrc99a-TycC, respectively (Table S1).

pCTRB-TycC6 C-A-T: To generate the plasmid for yeast surface display of the C, A and T domains of the last module of TycC, three PCR fragments were generated using the primer pairs H32/P43 (template: pCTRB-TycA AT), P101/G103 (template: pTrc99a-TycC), and P30/H33 (template: pCTRB-TycA AT) (Table S1).

### **Production of tyrocidine synthetase proteins in *E. coli***

To produce tyrocidine synthetase, the procedure reported by Niquille and Folger et al.<sup>4</sup> was adopted with minor adaptations. The constituent proteins of the synthetase were produced with an N-terminal (TycA) or C-terminal (TycB variants and TycC) His<sub>6</sub>-tag in *E. coli* strain HM0079.<sup>2</sup> The cell cultures were supplemented with chloramphenicol (30 µg/mL, PanReac AppliChem) for TycA production or with ampicillin (100 µg/mL, PanReac AppliChem) for TycB and TycC production. Briefly, 5 mL LB Miller broth containing the appropriate antibiotic were inoculated with a single HM0079 colony transformed with the desired plasmid (pSU18His-TycA, pTrc99a-TycB, pTrc99-M1786A/M1803I-TycB or pTrc99a-TycC) and incubated overnight at 37 °C, 230 rpm. The culture was prepared in a 2 L baffled flask, containing 800 mL modified Studier medium.<sup>10</sup> The modified Studier medium is based on LB Miller broth to which MgSO<sub>4</sub> (2 mM), glycerol (Acros, 1% (m/v)), Na<sub>2</sub>HPO<sub>4</sub> (25 mM), KH<sub>2</sub>PO<sub>4</sub> (FisherBio, 25 mM), NH<sub>4</sub>Cl (50 mM), and Na<sub>2</sub>SO<sub>4</sub> (5 mM) were added. The medium was additionally supplemented with the appropriate antibiotic, inoculated at a 1:500 ratio with the pre-culture and incubated at 37 °C, 190 rpm for 4-6 h until an OD<sub>600</sub> of around 2 was reached. At this point, protein expression was induced by adding isopropyl β-d-1-thiogalactopyranoside (PanReac AppliChem, 250 µM), and the culture was incubated at 20 °C, 190 rpm for 20 h. The cells were centrifuged at 5,000 x g, 4 h for 20 min and the pellet was stored at -20 °C.

### **Protein purification**

The heterologously expressed tyrocidine synthetase proteins were purified as reported by Niquille and Folger et al.<sup>4</sup> Briefly, to lyse the HM0079 cells containing the protein of interest,

the thawed pellet was resuspended in 30 mL Tris-HCl (50 mM) buffer pH 8.0, supplemented with NaCl (500 mM), and glycerol (10% (w/v)). Polymyxin (Apollo, 1 mg/mL), RNase A (AppliChem, 10 µg/mL), DNase (PanReac AppliChem 10 µg/mL), and lysozyme (PanReac, 1 mg/ml) were added to increase lysis efficiency. The solution was incubated at 4 °C for 20 min before sonication at 60% amplitude in a Q700 sonicator (Qsonica) equipped with a 1/4 microtip (sonication time: 4 cycles of 30 s each with a 30 s break in between). The solution was centrifuged at 15,000 x g for 20 min at 4 °C and the supernatant containing the soluble protein was applied to pre-equilibrated Ni-NTA columns containing 5 mL Ni-beads (Quiagen). The collected flow-through was added to the Ni-NTA column again. The proteins bound to the Ni-NTA were washed with 40 mL Tris-HCl (50 mM) buffer pH 8.0, containing NaCl (500 mM), imidazole (Apollo Scientific, 20 mM), and glycerol (10% (w/v)). The bound protein was eluted from the column by addition of 10 mL Tris-HCl (50 mM) buffer pH 8.0, supplemented with NaCl (500 mM), imidazole (300 mM), and glycerol (10% (w/v)). The buffer was exchanged to Bis-Tris propane (Apollo, 50 mM) pH 7.25, containing NaCl (100 mM), MgCl<sub>2</sub> (10 mM), glycerol (10% (w/v)) using Amicon-Ultra-15 centrifugal filters (Merck, MWCO=10,000). The proteins were aliquoted, flash frozen in liquid nitrogen and stored at -80 °C until further use. Protein concentration was determined from the absorption at 280 nm measured on a Nanodrop 2000 spectrophotometer (Thermo Fisher). Extinction coefficients were calculated by the <https://web.expasy.org/protparam/> webtool. Proteins were analyzed on 7.5% SDS-PAGE gels using a Phast system to assess purity.

### **MS/MS analysis of the propargylated tyrocidine analogue**

Aliquots (10 µL) from the quenched biosynthetic reaction mixtures were analyzed on an Agilent 1290 Infinity II liquid chromatography system coupled to a Bruker maXisII-ESI-Q-TOF MS system (Bruker Daltonics) and equipped with an Agilent ZorbaxEclipse Plus C18 column (3.5 µm 3.0 x 50 mm). The mobile phase was a mixture of 0.1% (v/v) formic acid in water and 0.1% (v/v) formic acid in acetonitrile. A linear gradient from 2% to 98% acetonitrile over 10 min was used at a flow rate of 0.6 mL/min. The ESI-TOF mass spectrometer was calibrated routinely for LC-MS in the positive electrospray ionization mode using the Agilent-ESI-TOF tuning mix in the enhanced quadratic algorithmic mode. The offset of each spectrum in the chromatogram was corrected with methylstearate and an Agilent Tunemix-mass 622 (m/z 299.2945 and 622.0290 respectively). The optimized source conditions were 8.0 l/h drying gas (nitrogen 99,99% purity) at a temperature of 180 °C, 1.6 bar nebulizer pressure, capillary and endplate voltages of 4,500 and 500 V, respectively, 12,000 V TOF flight tube voltage, 3,183 V reflection voltage, 1,700 V pusher voltage, and 2,268 V MCP detector voltage. The resolving power of the instrument was around 100,000 at m/z 1375 with 4 Hz spectra rate, depending on the sample concentration and peak width. For LC-MS/MS experiments (collision-induced dissociation; CID), the “Auto-MSMS-Mode” with an automatic precursor selection (5 Highest MS Signals) was used; isolation width m/z 3 at m/z 1375) and variable collision energy (20-90 eV; ISCID 0.0 eV) with nitrogen (99.99%) as collision gas (flow rate 28%). Data Analysis 5.1 (Built 201.2.4019) (64bit) software (Bruker Daltonics, Germany) was used for data processing.

## Supplementary figures

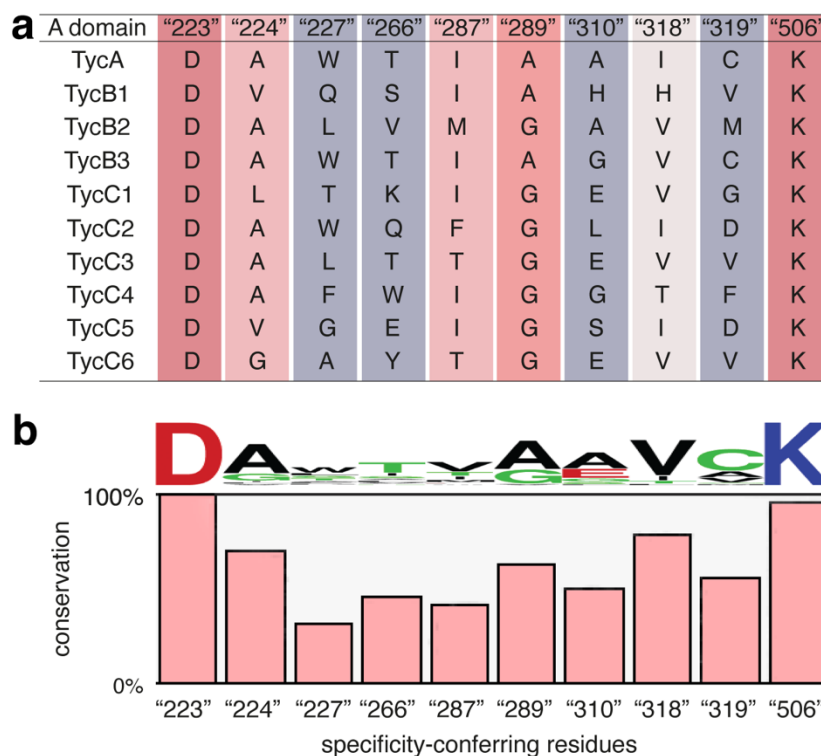

**Figure S1:** (a) Sequence alignment of the specificity determining residues of all ten A domains of tyrocidine synthetase. Dark red indicates high conservation and dark blue high variability. (b) Conservation of the specificity determining residues of 27 A domains, including TycA, TycB2, TycB3 and TycC3 from panel (a), that activate aromatic amino acids (twelve specific for Tyr, eleven for Phe, three for Trp, and one for phenyl glycine).<sup>13,14</sup> TycA numbering is used. The sequence logo above the bar graph indicates the preferred residue(s).

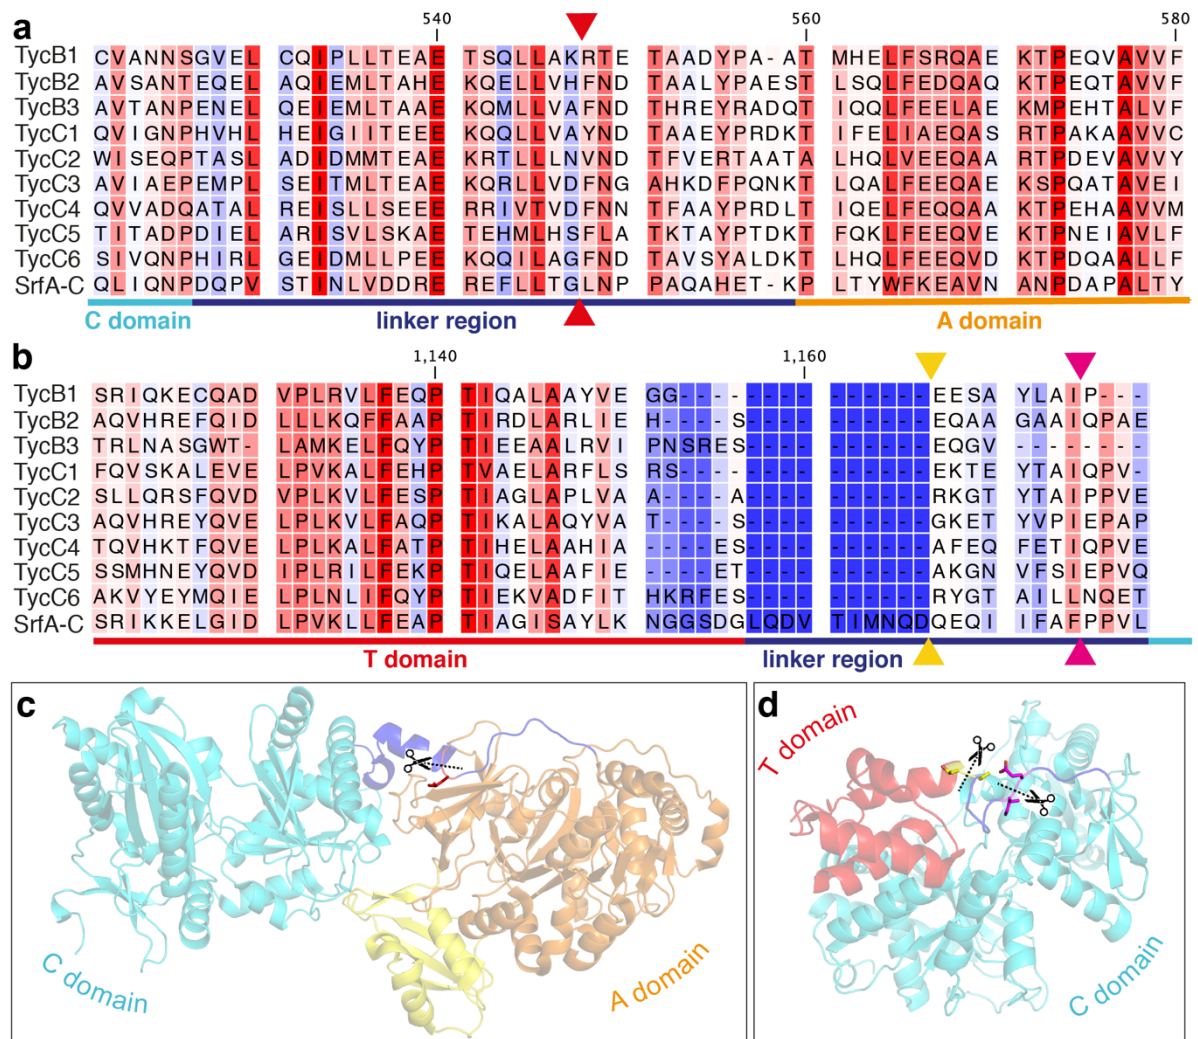

**Figure S2.** Cleavage sites for excising NRPS elongation modules for functional display on yeast. (a) Sequence alignment of the linker regions connecting the C and A domains of all TycB and TycC modules with structurally characterized SrfA-C, which served as a reference. The N-terminal excision site selected for the A-T constructs is indicated by red triangles. Dark red indicates high conservation, whereas dark blue indicates high variability. (b) The C-terminal excision site for the A-T and C-A-T constructs (magenta triangles) and the N-terminal excision site for C-A-T constructs (yellow triangles). (c) Crystal structure of SrfA-C (PDB: 2VSQ, residues 398-510),<sup>11</sup> showing the N-terminal excision site for the A-T constructs (red). The C domain is colored cyan, the A domain orange/yellow, and linker regions dark blue. (d) Crystal structure of the TycC5-TycC6 T-C bidomain (PDB: 2JGP)<sup>12</sup> showing the N-terminal excision site for C-A-T constructs (yellow) and C-terminal (magenta) excision site for A-T and C-A-T constructs. The T and C domains are colored red and cyan, respectively.



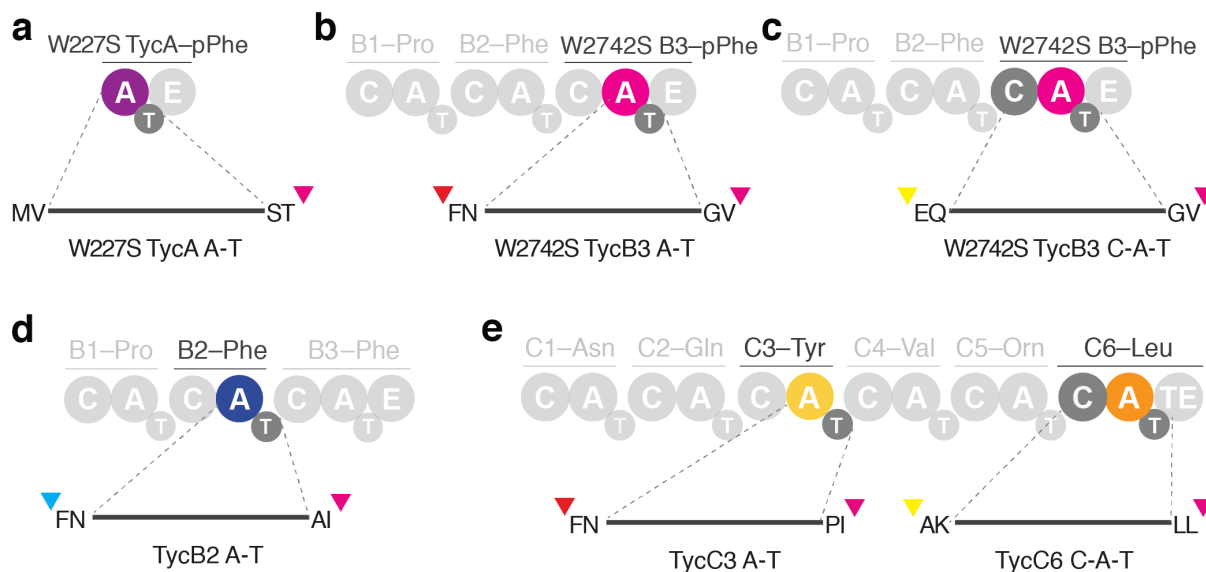

**Figure S3.** Tyrocidine synthetase domains/modules chosen for yeast display, showing their native context within the megaenzyme. The segment below the synthetase indicates the N- and C-terminal amino acids of the display constructs with triangles, colored as in Figure S2, indicating the cleavage sites chosen. (a) The previously described TycA A-T bidomain.<sup>3</sup> Its A domain (purple) contained the W227S mutation that confers pPhe specificity. The corresponding (b) A-T and (c) C-A-T constructs from TycB3 are shown. The A domain of TycB3 (magenta) contained the W2742S mutation to accommodate pPhe. (d) The analogous A-T construct from TycB2 was engineered in high-throughput to switch its substrate specificity from L-Phe to pPhe. (e) The A-T construct from TycC3 (yellow) and the C-A-T construct from TycC6 (orange) are illustrated.

|    |            |            |            |            |
|----|------------|------------|------------|------------|
| WT | NSVTWNRDEF | ALSVRDSGTL | SLSFAFDAFA | LTFFTLIVSG |
| v1 | .....      | .....      | .....      | .....      |
| v2 | .....      | .....      | .....      | .....      |
| v3 | .....      | .....      | .....      | .....      |
| v4 | .....      | .....      | .....      | .....      |
| v3 | .....      | .....      | .....      | .....      |

1704

|    |             |            |            |             |
|----|-------------|------------|------------|-------------|
| WT | IQAVMLGGEK  | LSPKLVQLCK | AMHPQMSVMN | AYGPTSSVM   |
| v1 | .....G..... | .....      | .....      | .....       |
| v2 | .....A..... | .....      | .....      | .....I..... |
| v3 | .....G..... | .....      | .....      | .....V..... |
| v4 | .....C..... | .....      | .....      | .....V..... |
| v3 | .....G..... | .....      | .....      | .....V..... |

1768

1803

**Figure S4:** TycB2 mutations that confer activity with pPhe.

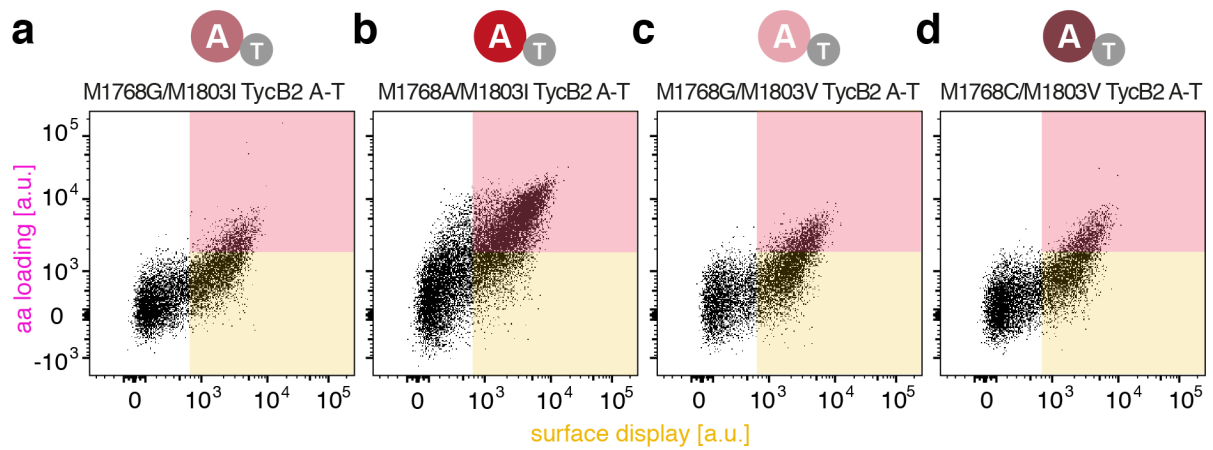

**Figure S5:** The activity of TycB2 variants 1 (a), 2 (b), 3 (c) and 4 (d) displayed on the surface of yeast. Assays were performed with 0.1 mM ATP and 0.5 mM pPhe in the presence of 0.5 mM Phe as a competitive inhibitor. The fraction of cells in the pink quadrant correlates with the ability of the displayed A domain to activate pPhe and transfer it to the ppan cofactor of the T domain tethered to the cell surface.

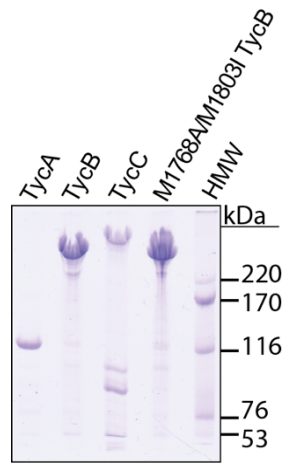

**Figure S6:** 7.5% SDS-PAGE gel showing purified His<sub>6</sub>-tagged TycA, TycB, TycC and the variant M1768A/M1803I TycB produced in *E. coli* HM007. HMW= High molecular weight ladder (GE).

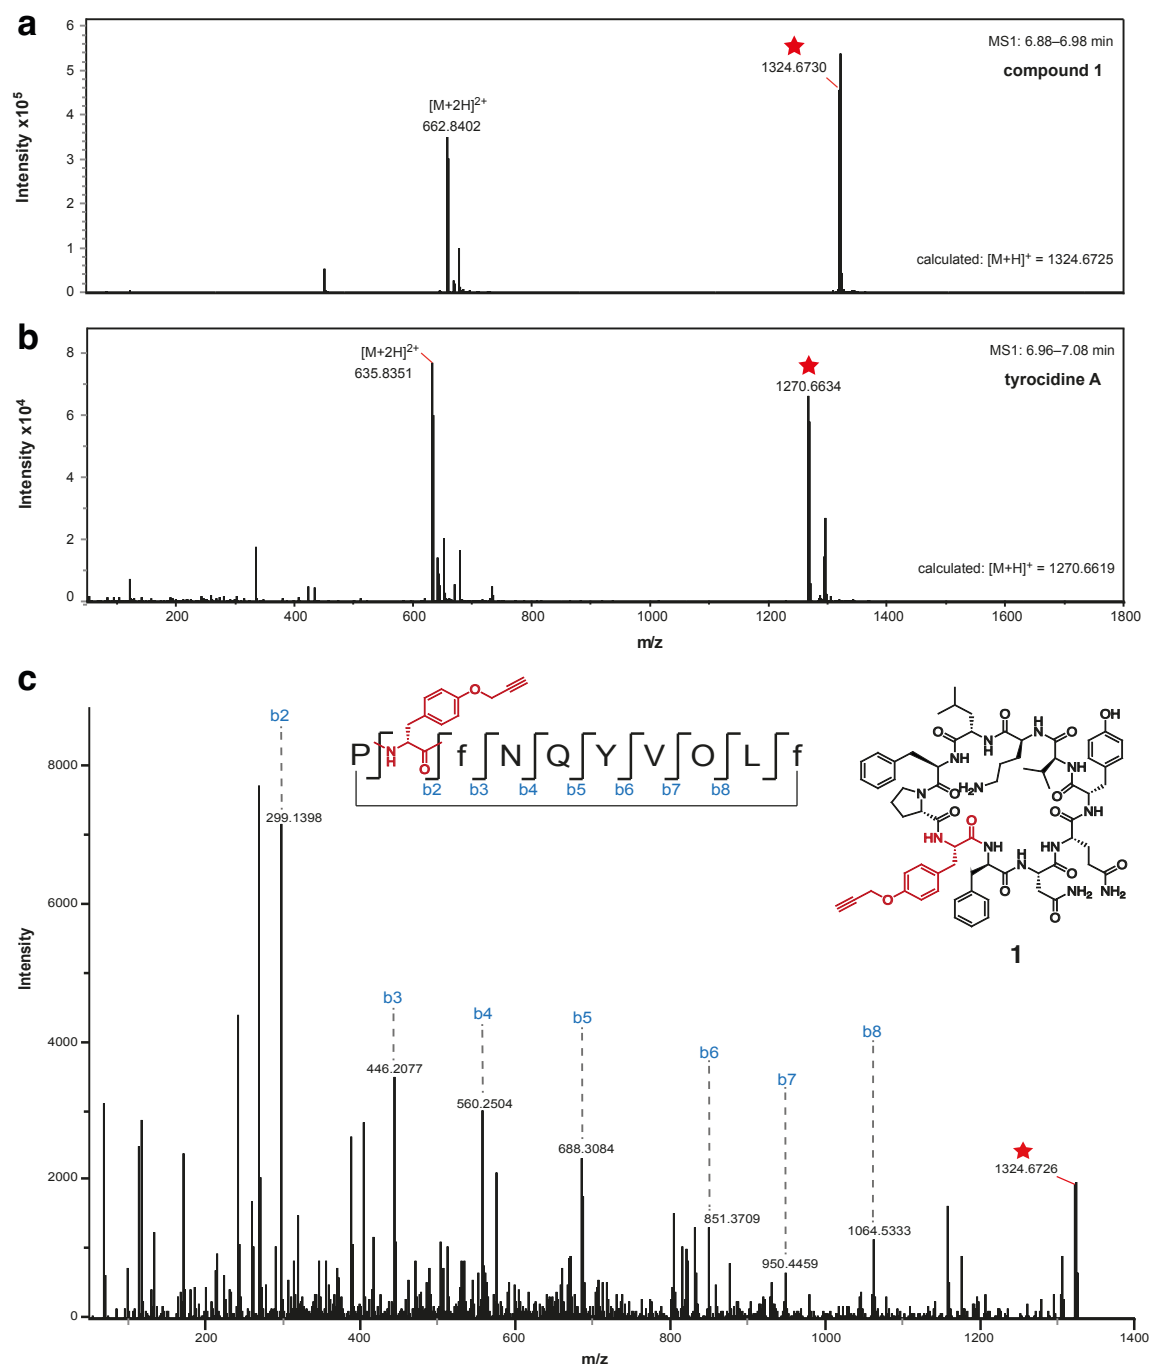

**Figure S7:** MS/MS characterization of the products of the *in vitro* biosynthetic reaction catalyzed by TycA, M1768A/M1803I TycB and TycC in the presence of pPhe. (a) The selected mass of the major product that elutes at a retention time of 6.88–6.98 (see Fig. 5 in the main text) is consistent with the propargyloxy-tyrocidine derivative **1** (calculated  $[M+H]^+$  1324.6725 Da; found 1324.6730 Da). (b) The side product that elutes at a retention time of 6.96–7.08 min is wildtype tyrocidine A (calculated  $[M+H]^+$  1270.6619; found 1270.6634 Da). (c) MS2 spectrum of the major product confirms its assignment to structure **1**, with the noncanonical pPhe incorporated site-specifically as the third residue in the natural product analogue. The observed fragmentation masses (b-ions) are shown in blue below the single letter code of the sequence, the sites of fragmentation are marked with dashed lines, and the parent ion is highlighted with a red star. O stands for Orn and f for D-Phe; all other capital single letters refer to L-amino acids.

## Protein sequences

**Aga-HA-W2742S-TycB3-A-T-c-myc** (protein sequence displayed on yeast, bold amino acid marks start of NRPS protein and highlighted in blue is W2742S mutation)

MQLLRCSFISVIA SVLAQELTTICEQIPSPLESTPYSLSSTTTILANGKAMQGVFEYYKSVTFVSNCGSHPSTTSKGSPI  
INTQYVFKDNSSTIEGRYPYDVPDYALQASGGGGSGGGSGGGGSHMFNDTHREYRADQTIQQLFEEELAEKMPEH  
TALVFEKRMSFRELNERANQLAAVLREKGVGPAQIVALLVERSAEMVIATLATLKAGGAFLPVDPDYPEERIRYM  
LEDSQAKLVVTHAHLHLHKVSSQSEVVDVDDPGSYATQTDNLPCANTPSDLAYIIYTSGTTGKPKGVMLEHKGVAN  
LQAVFAHHLGVTPQDRAGHFASISFDASVSDMFGPLLSGATLYVLSRDVINDFQRF AEYVRD NAITFLTLPTTYAIY  
LEPEQVPSRLTLITAGSASSVALVDKWKEKVTYVNGYGPTTESTVCATLWKAKPDEPVEITITIGKPIQNTKLYIVDDQ  
LQKAPGMGELCISGLSLARGYWNRPELTA EKFDVNDPFPVPGTKMYRTGDLARWLPDGTIEYLRIDHGVKIRGH  
RVELGEVESVLLRYDVTKEAAAITHEDDRGQAYLCAYYVAEGEATPAQLRAYMENELPNYMVPAFFIQLEKMP  
PNDKIDRKALPKPNQEENRTEQYAAPQTELEQLLAGIWADVLGIKQVGTQDNFFELGGDSIKAIQVSTRLNASGWT  
LAMKELFQYPTIEEAALRVIPNSRESEQGVLEEQKLISEEDL

**Aga-HA-W2742S-TycB3-C-A-T-c-myc** (protein sequence displayed on yeast, bold amino acid marks start of NRPS protein and highlighted in blue is W2742S mutation)

MQLLRCSFISVIA SVLAQELTTICEQIPSPLESTPYSLSSTTTILANGKAMQGVFEYYKSVTFVSNCGSHPSTTSKGSPI  
INTQYVFKDNSSTIEGRYPYDVPDYALQASGGGGSGGGSGGGGSHMEQAAGAAIQPAEPQAYYPVSSAQQRMY  
LLHQLEGAGISYNTPGIIMLEGKLDREQLANALQALVDRHDILRTSFEMVGDELVQKIHDRVAVNMEYVTAEEQQI  
DDLHFHAFVRPFDLSVPLLRLMSLVKLADERHLLLYDMHHAADAASITILFDELAELYQGRELP EMRIQYKDFAVW  
QKALHESDAFKQQEAYWLSTFAGNITAVDVPTDFPRPAVKSFAGQVTLSDMQELLSALHELAAHTNTTLFMVLL  
AAYNVLLAKYAGQDDIIVGTPISGRSRAELAPVVGFMFVHTLAIRNKPTAEKTFKQFLQEVKQNALDAFDHQDY PFE  
SLVEKLGIPRDPGRNPLFDTMFILQNDLHAKTLDQLVYRYPYEDSALDVAKFDLSFHLTERETDLFLRLEYCTKLF  
KQQTVERMAHHLFLQILRAVTANPENELQEIEMLTAAEKQMLLVAFNDTHREYRADQTIQQLFEEELAEKMPEHTAL  
VFEKRMSFRELNERANQLAAVLREKGVGPAQIVALLVERSAEMVIATLATLKAGGAFLPVDPDYPEERIRYMLED  
SQAKLVVTHAHLHLHKVSSQSEVVDVDDPGSYATQTDNLPCANTPSDLAYIIYTSGTTGKPKGVMLEHKGVANLQA  
VFAHHLGVTPQDRAGHFASISFDASVSDMFGPLLSGATLYVLSRDVINDFQRF AEYVRD NAITFLTLPTTYAIYLEPE  
QVPSRLTLITAGSASSVALVDKWKEKVTYVNGYGPTTESTVCATLWKAKPDEPVEITITIGKPIQNTKLYIVDDQLQK  
APGMGELCISGLSLARGYWNRPELTA EKFDVNDPFPVPGTKMYRTGDLARWLPDGTIEYLRIDHGVKIRGHRVEL  
GEVESVLLRYDVTKEAAAITHEDDRGQAYLCAYYVAEGEATPAQLRAYMENELPNYMVPAFFIQLEKMP  
PNDKIDRKALPKPNQEENRTEQYAAPQTELEQLLAGIWADVLGIKQVGTQDNFFELGGDSIKAIQVSTRLNASGWT  
LAMKELFQYPTIEEAALRVIPNSRESEQGVLEEQKLISEEDL

**Aga-HA-TycC3-A-T-c-myc** (protein sequence displayed on yeast, bold amino acid marks start of NRPS protein)

MQLLRCSFISVIA SVLAQELTTICEQIPSPLESTPYSLSSTTTILANGKAMQGVFEYYKSVTFVSNCGSHPSTTSKGSPI  
INTQYVFKDNSSTIEGRYPYDVPDYALQASGGGGSGGGSGGGGSHMFNGAHKDFPQNKTLLQALFEEQAEKSPQA  
TAVEISGQPLSYQELNERANQLAATLRERGVQPDQPVGIMANRSVEMVVGILAILKAGGAYVPIDPEYPEERVAYM  
LTDCQARLVLTQKHLGAKLGSSVTAECYLDDESNGVHRSNLQPINTASDLAYIIYTSGTTGKPKGVMVEHRGIV  
NNVLWKKAEYQMKVGDRSLLSLSFAFDVLSFFTPVLSGATVVLAEDEEAKDPVSLKLLIAASRCTLMTGVPSLF  
QAILECSTPADIRPLQTVTLGGEKITAQLVEKCKQLNPDLVIVNEYGPTSESSVATWQRLAGPDAAITIGRPIANTSL  
YIVNQYHQLPQIGVVEICIGGRGLARGYWNKPALTEEFVSHPF AAGERMYKTGDLGKWLDPGTIEYIGRIDEQV  
KVRGYRIEIGIEIESALLAEKLTAAVVVVYEDQLQGSALAA YFTADEQLDVTKLWSHLSKRLPSYMPAHFVQLDQ  
LPLTPNGKVDKALPKPEGKPVTEAQYVAPTNAVESKLAIEWVERVLGVSGIGILDNFFQIGGHSLKAMAVAAQVHR  
EYQVELPLKVLFAQPTIKALAQYVATSGKETYVPILEEQKLISEEDL

**Aga-HA-TycC6-C-A-T-c-myc** (protein sequence displayed on yeast, bold amino acid marks start of NRPS protein)

MQLLRCSFISVIAVLAQELTTICEQIPSPLESTPYSLSSTTILANGKAMQGVFEYYKSVTFVSNCGSHPSTTSKGGSP  
INTQYVFKDSSSTIEGRYPYDVPDYALQASGGGGGGGGGGGGSHMAKGNVFSIEPVQKQAYYPVSSAQKRMYYI  
LDQFEGVGISYNMPSTMLIEGKLERTRVEAAFQRLIARHESLRTSFAVNGEPVQNIHEDVPFALAYSEVTEQEARE  
LVSSLVQPFDELVAPLIRVSLKIGEDRYVLFDTMHHSISDGVSSGILLAEVWVQLYQGDVLPRLIQYKDFAVWQQE  
FSQSAAFHKQEAYWLQTFADDIPVLNLPDFTFRPSTQSFAGDQCTIGAGKALTEGLHQLAQATGTTLYMVLLAAY  
NVLLAKYAGQEDIIVGTPITGRSHADLEPIVGMFVNTLAMRNKQREKTFSEFLQEVKQNALDAYGHQDYPFEEVLV  
EKLAIARDLSRNPLFDTVFTFQNSTEEVMTLPECTLAPFMTDETGGHAKFDLTFSAATEEREEMTIGVEYSTSLFTRET  
MERFSRHFLTIAASIVQNPHIRLGEIDMLLPEEKQQLAGFNDAVSYALDKTLHQLFEEQVDKTPDQAALLFSEQSL  
TYSELNERANRLARVLRKAGVGPDRLLVAIMAERSPEMVGILGILKAGGAYVPVDPGYPQERIQYLLSNAALLS  
QAHLPLLAQVSSPECLDLNAELDAGLSGNLPAVNQPTDLAYVIYTSGTTGKPKGVMIPHQGIVNCLQWRDE  
YGFGPSDKALQVFSFAFDGFVASFAPLLGGATCPLQEAADKDPVALKKLMAATEVTHYYGVPSLQAILDCSTT  
TDFNQLRCVTLGGKELPVQLVQKTKKHPAIEINNEYGPTENSVVTTISRSEAGQAITGRPLANVQVYIVDEQHHL  
QPIGVVVELCIGGAGLARGYLKPELTAEKFVANPFRPGERMYKTGDLVKWRDGTIEYIGRADEQVKVRGYRIE  
GEIESAVLAYQGIDQAVVVARDDDATAGSYLCAVFVAATAVSVSGLRSHLAKELPAYMIPSYFVELDQLPLSANG  
KVDRKALPKPQQSDATTREYVAPRNATEQQLAAIWQEVLGVEPIGTDQFFELGGHSLKATLLIAKVVEYMQIELPL  
NLIFQYPTIEKVADFIHKRFESRYGTAILLLEQKLISEEDL

**Aga-HA-TycB2-A-T-c-myc** (protein sequence displayed on yeast, bold amino acid marks start of NRPS protein and highlighted in red are target sites for mutagenesis)

MQLLRCSFISVIAVLAQELTTICEQIPSPLESTPYSLSSTTILANGKAMQGVFEYYKSVTFVSNCGSHPSTTSKGGSP  
INTQYVFKDSSSTIEGRYPYDVPDYALQASGGGGGGGGGGGGSHMFNDTAALYPAESTLSQLFEDQAQKTPEQ  
TAVVFGDKRLTYRELNERANQLAHTLRKAGVQAEQSVGIMAQRSLEMAIGIHAAILKAGGAYVPIDPDYPNERIAYM  
LEDCEARLVLTQQQLAEKMTANVECLYLDEEGSYSPQ TENIEPIHTAADLAYIIYTSGTTGRPKGVMVEHRGIVNSV  
TWNRDEFALSVRDSGTLSSFAFDALFTFTLIVSGSTVVLMPDHEAKDPIALRNLIAAWECYSVVFPSPMFQAIL  
ECSTPADIRSIQAVMLGGKLSPKLVQLCKAMHPQMSVMNA YGPTESSVMATYLRDTPDQIPITGRPIANTAIYIV  
DQHHQLLPVGVVGEICIGGHGLARGYWKPELTAEKFVANPAVGERMYKTGDLGRWLHDGTIDFIGRVDQIKV  
RGYRIEVEIEAVLLAYDQTNEAIVVAYQDDRGSYLAAYVTGKTAIESELRAHLLRELPAVMPTYLIQLDAFPL  
TPNGKVDRKALPKPEGKPATGAAYVAPATEVEAKLVAIWENALGISGVGLDHFELGGHSLKAMTVVAQVHRE  
FQIDLLKQFFAAPTIRDLARLIEHSEQAAGAAILEEQKLISEEDL

**M1768A/M1803I-TycB-His** (best protein variant isolated from the library for activation of *4-propargyloxy phenylalanine*. The mutated residues are highlighted in red)

MSVFSKEQVQDMYALTPMQEGMLFHALLDQEHNSHLVQMSISLQGDLDVGLFTDSLHVLVERYDVFRTLFLYEK  
LKQPLQVVLKQRPPIEFYDLSACDESEKQLRYTQYKRADQERTFHLAKDPLMRVALFQMSQHDYQVIWSFHILM  
DGWCFSIIFDILLAIYLSLQNKTALESLEPVQPYSRFINWLEKQNKQAALNYWSDYLEAIEYEQKTTLPKKEAAFAKAF  
QPTQYRFLSNRTLKQLGTIASQNVTLSTVIQTIWGVLLQKYNAAHDLVFGSVVSGRPTDIVGIDKMVGLFINTIPF  
RVQAKAGQTFSELLQAVHKRTLQSQPYEHVPLYDIQTQSVLKQELIDHLLVIENYPLVEALQKKALNQQIGFTITAV  
EMFEPTNYDLTVMVMPKEELAFRFDYNAALFDEQVQKLAGHLQQIADCVANNSGVELCQIPLLTEAETSQLLAK  
RTETAADYPAATMHELFSRQAEKTPEQVAVVFADQHLTYRELDEKSNQLARFLRKKGIGTGSLVGTLLDRSLDMI  
VGILGVLKAGGAFVPIDPELPAERIAYMLTHSRVPLVVTQNHLRAKVTTPTETIDINTAVIGESRAPIESLNQPHDLF  
YIIYTSGTTGQPKGVMLEHRNMANLMHFTFDQTNIAFHEKVLQYTTCSFDVCYQEIFSTLLSGGQLYLITNELRRHV  
EKLFAFIQEKQISILSLPVSFLKIFNEQDYAQSFPKCVKHIITAGEQLVVTHELQKYLQRHVRFLHNHYGPSETHVVT  
TCTMDPGQAIPELPPIGKPISTNGIYLDEGLQLKPEGIVGELYISGANVGRGYLHQPELTAEKFLDNPYQPGERMYR  
TGDLARWLPDGGLEFLGRIDHQVKIRGHRIELGEIESRLNHPAIEAVVIDRADETGGKFLCAYVVLQKALSDEEM  
RAYLAQALPEYMIPSFVTLERIPVTPNGKTDRRALPKPEGSAKTKADYVAPTTELEQKLVAIWEQILGVSPIGIQDH  
FFTLLGGHSLKAIQLISRIQKQADVPLRVLFQOPTIQAALAYVEGGEESAYLAIPQAEPQAYYPVSSAQKRMILNQL  
LDPHSTVYNLPVAMILEGTLDKARLEHAISNLVARHESLRTSFHTINGEPVSRIHEQGHLPIVYLETAEQVNEVILG  
FMQPFDLVTAPLCRVGLVLAENRHVLIIDMHHSISDGVSSQLILNDFSRLYQNKALPEQRIHYKDFAVWEKAWTQ  
TTDYQKQEKYWLDRFAGEIPVLNLPMDYPRPAVQSFEGERYLFRTKQLLESQDVAQKTGTTLYMVLLAAYHVL  
LSKYSQDDVMIGTVTAGRVHPDTEMTGMFVNTLAMRNQSAPTQFRQFLLEVKDNTLAAFEHGQYPFEELVEK  
LAIQRNRSRNPLFDTLFIQNMDADLIELDGLTVTPYVPEGEVAKFDLSLEASENQAGLSFCFEFCTKLFARETIERM

SLHYLQILQAVSANTEQELAQIEMLTAEHEKQELLVHFNDTAALYPAESTLSQLFEDQAQKTPEQTAVVFGDKRLTY  
RELNERANQLAHTLRAGVQAEQSVGIMAQRSLEMAIGHAILKAGGAYVPIDPDYPNERIAYMLEDCEARLVLTQ  
QQLAEKMTANVECLYLDEEGSYSPQTENIEPIHTAADLAYIIYTSGTTGRPKGVMVEHRGIVNSVTWNRDEFALSV  
RDSGTLSLSFAFDALFTFFTLIVSGSTVVLMPDHEAKDPIALRNLIAAWECYSYVVFVPSMFQAILECSTPADIRSIQA  
VALGGEKLSPKLVQLCKAMHPQMSVMNAYGPTESSVIATYLRDTQPDQPITIGRPIANTAIYIVDQHHQLLPVGVV  
GEICIGHGLARGYWKPELTAEFVANPAVPERMYKTGDLGRWLHDGTIDFIGRVDDQIKVRGYRIEVGEIEAV  
LLAYDQTNEAIVVAYQDDRGDSYLAAYVTGKTAIEESELRAHLLRELPAVMVPTYLIQLDAFPLTPNGKVDRKALP  
KPEGKPATGAAYVAPATEVEAKLVAIWENALGISGVGLDHFELGGHSLKAMTVVAQVHREFQIDLLKQFFAA  
PTIRDLARLIEHSEQAAGAAIQPAEPQAYYPVSSAQQRMYLLHQLEGAGISYNTPGIIMLEGKLDREQLANALQALV  
DRHDILRTSFEMVGDELVQKIHDRVAVNMEYVTAEQQIDDLFHAFVVRPFDLSVPPLLRMSLVKLADERHLLLYD  
MHHAADAASITILFDELAELYQGRELPEMRIQYKDFAVWQKALHESDAFKQQEAYWLSTFAGNITAVDVPTDFPR  
PAVKSFAGGQVTLSDQELLSALHELAHAHTNTLFLMVLAAYNVLLAKYAGQDDIIVGTPISGRSRAELAPVVG  
FVHTLAIRNKPTAEKTFKQLQEVKQNALDAFDHQDYPFESLVEKLGIPRDPGRNPLFDTMFILQNDLHAKTLDQL  
VYRPPYESDSALDVAKFDLSFHLTERETDLFLRLEYCTKLFKQQTVERMAHHFLQILRAVTANPENELQEIEMLTAA  
EKQMLLVAFNDTHREYRADQTIQQLFEELAEKMPHEHTALVFEEKRMSFRELNERANQLAAVLREKGVGPAQIVAL  
LVERSAEMVIATLTLKAGGAFLPVDPDYPEERIRYMLEDSQAKLVVTHAHLHKVSSQSEVVVDVDDPGSYATQT  
DNLPCANTPSDLAYIIYTSGTTGKPKGVMLEHKGVANLQAVFAHHLGVTPQDRAGHFASISFDASVWDMFGPLLS  
GATLYVLSRDVINDFQRFAEYVRDNAITFLTPPTYAIYLEPEQVPSLRTLITAGSASSVALVDKWKVKVTVVNGY  
PTESTVCATLWKAKPDEPVETITIGKPIQNTKLYIVDDQLQLKAPGQMGELCISGLSLARGYWNRPELTAEFVDNP  
FVPGTKMYRTGDLARWLPDGTIEYLGRIDHQVKIRGHRVELGEVESVLLRYDVTVEAAAITHEDDRGQAYLCAYY  
VAEGEATPAQLRAYMENELPNYMVPAFFIQLEKMPPLTPNDKIDRKALPKPNQEENRTEQYAAPQTELEQLLAGIW  
ADVLGKQVGTQDNFFELGGDSIKAIQVSTRNLASGWTLAMKELFQYPTIEEAALRVIPNSRESEQGVVEGEIALPI  
QKWWFANNFTDRHHWNQAVMLFREDGFDEGLVRQAFQQIVEHHDALRMVYKQEDGAIKQINRGLTDERFRFYSY  
DLKNHANSEARILELSDQIQSSIDLEHGPLVHVALFATKDGDLHLLVAIHHLVVDGVSWRILFEDFSSAYSQALHQE  
IVLPKKTDSFKDWAAQLQKYADSDELLREVAYWHNLETTTTTAAALPTDFVTADRKQKHTRTSLFALTPQTENLL  
RHVHHAYHTEMNDLLLALGLAVKDWHTNGVVINLEGHGREDIQNEMNVTRTIGWFTSQYPVLDMEKAEDL  
PYQIKQTKENLRIPKKGIGYEILRTLTTSQLQPPLAFTLRPEISFNLYLGGFESDGKTGGFTSPLGTGQLFSPESERV  
LLDISAMIEDGELRISVGYRSLQYEEKTIASLADSYRKHLLGIEHCMAKEEGEYTPSDLGDEELSMEELENILEWIGS  
RSHHHHHH



## DNA sequences

### pCTRB vector backbone

TAGGTCGAGATCTGATAACAACAGTGTAGATGTAACAAAATCGACTTTGTTCCCACTGTACTTTTAGCTCGTAC  
AAAATACAATATACTTTTCATTCTCCGTAACAACATGTTTTCCCATGTAATATCCTTTTCTATTTTTTCGTTCC  
GTTACCAACTTTACACATACTTTATATAGCTATTCACCTTCTATACACTAAAAAACTAAGACAATTTTAATTTTG  
CTGCCTGCCATATTTCAATTTGTTATAAATTCCTATAATTTATCCTATTAGTAGCTAAAAAAGATGAATGTGA  
ATCGAATCCTAAGAGAATTGAGCTCCAATTCGCCCTATAGTGAGTCTGATTACAATTCAGTGGCCGTCGTTTTA  
CAACGTCGTGACTGGGAAAACCTGGCGTTACCCAACCTAATCGCCTTGCAGCACATCCCCCTTCGCCAGCT  
GGCGTAATAGCGAAGAGGCCCGCACCGATCGCCCTTCCCAACAGTTGCGCAGCTGAATGGCGAATGGCGCG  
ACGCGCCCTGTAGCGGCGCATTAAAGCGCGCGGGTGTGGTGTACGCGCAGCGTGACCGCTACACTTGCCAG  
CGCCCTAGCCCGCGCTCCTTCGCTTTCCTCCCTTCTTCGTTCTCGCCACGTTTCGCCGGCTTTCCCGTCAAGCTCT  
AAATCGGGGGCTCCCTTAGGGTTCCGATTTAGTGCTTTACGGCACCTCGACCCCAAAAACTTGATTAGGGT  
GATGGTTCACGTAGTGGGCCATCGCCCTGATAGACGGTTTTTCGCCCTTTGACGTTGGAGTCCACGTTCTTTAA  
TAGTGGACTCTTGTTCAAAACCTGGAACAACACTCAACCCTATCTCGGTCTATTCTTTTGATTTATAAGGGATTT  
TGCCGATTTTCGGCTATTGGTTAAAAAATGAGCTGATTTAACAAAAATTAACGCGAATTTTAACAAAATATT  
AACGTTTACAATTTCTGATGCGGTATTTTCTCCTTACGCATCTGTGCGGTATTTTACACCCGCAGGCAAGTGCA  
CAAAACAATACTAAATAAATACTACTCAGTAATAACCTATTTCTTAGCATTTTTGACGAAATTTGCTATTTTGT  
TAGACTTTTTACACCAATTTGCTCCACACCTCCGTTACATCAACACCAATAACGCAATTTAATACGCTCT  
TCACCAACATTTTCTGGCGTCAGTCCACCCAGCTAACATAAAATGTAAGCTTTTCGGGGCTCTCTGCCTTCCAAC  
CCAGTCAGAAATCGAGTTCCAATCCAAAAGTTTACCTGTCCACCTGCTTCTGAATCAAACAAGGGAATAAAC  
GAATGAGTTTCTGTGAAGCTGCACTGAGTAGTATGTTGCAGTCTTTTGAAAATACGAGTCTTTAATAACTGG  
CAAACCGAGGAACCTTGGTATTCTTGCCACGACTCATCTCCATGCAGTTGGACGATATCAATGCCGTAATCAT  
TGACCAGAGCCAAAACATCCTCCTTAGGTTGATTACGAAAACACGCCAACCAAGTATTTTCGGAGTGCCTGAACT  
ATTTTTATATGCTTTTACAAGACTTGAATTTTCTTGAATAAACCGGGTCAATTGTTCTTTTCTATTGGGCAC  
ACATATAATACCCAGCAAGTCAGCATCGGAATCTAGAGCACATTTCTGCGGCCTCTGTGCTCTGCAAGCCGCAA  
ACTTTCACCAATGGACCAGAACTACCTGTGAAATTAATAACAGACATACTCCAAGCTGCCCTTTGTGTGCTTAAT  
CACGTATACTCACGTGCTCAATAGTCACCAATGCCCTCCCTCTGGCCCTCTCCTTTTTCTTTTTTCGACCGAATT  
AATTCTTAATCGGCAAAAAAAGAAAAGCTCCGGATCAAGATTGTACGTAAGGTGACAAGCTATTTTTCAATAA  
AGAATATCTTCCACTACTGCCATCTGGCGTCATAACTGCAAAGTACACATATATTACGATGCTGTCTATTAAT  
GCTTCTATATTATATATATAGTAATGTCGTTTATGGTGCACCTCAGTACAATCTGCTCTGATGCCGCATAGTT  
AAGCCAGCCCCGACACCCGCAACACCCGCTGACGCGCCCTGACGGGCTTGTCTGCTCCCGGCATCCGCTTAC  
AGACAAGCTGTACCGTCTCCGGGAGCTGCATGTCTCAGAGTGTATACCGTATCACCCGAAACGCGCGAGAC  
GAAAAGGCCCTCGTGATACGCTATTTTTATAGGTTAATGTCTAGATAAATAATGGTTTCTTAGGACCGATCGCTT  
GCCTGTAACCTTACACGCGCCTCGTATCTTTAATGATGGAATAATTTGGGAATTTACTCTGTGTTTATTTATTTT  
TATGTTTTGTATTTGGATTTTAGAAAGTAAATAAAGAAGGTAGAAGAGTTACGGAATGAAGAAAAAAAATA  
AACAAAGTTTAAAAAATTTCAACAAAAAGCGTACTTTACATATATATTTATTAGACAAGAAAAGCAGATTAA  
ATAGATATACATTCGATTAACGATAAGTAAAAATGTAATAATCAGAGATTTTCGTGTGTGGTCTTCTACACAGA  
CAAGATGAAACAATTCGGCATTAAATACCTGAGAGCAGGAAGACAAAGATAAAAAGGTAGTATTTGTTGGCGAT  
CCCTTAGAGTCTTTTACATCTTCGAAAACAAAAACTATTTTTTCTTAAATTTCTTTTTTACTTTCTATTTTTA  
ATTTATATATTTATATTAATAAAAAATTTAAATATAATTTATTTATAGCAGTGATGAAAAGGACCCGATGGCA  
CTTTTCGGGGAATGTGCGCGGAACCCCTATTTGTTATTTTTCTAAATACATTCAAATATGTATCCGCTCATG  
AGACAATAACCCGTATAAATGCTTCAATAATATTGAAAAAGGAAGAGTATGAGTATTCAACATTTCCGTGTGCG  
CCCTTATCCCTTTTTTTCGGCATTGTCCTTCTGTTTTGCTCACCCAGAAACGCTGGTGAAGTAAAAGATG  
CTGAAGATCAGTTGGGTGCACGAGTGGGTTACATCGAACTGGATCTCAACAGCGGTAAGATCCTTGAGAGTTT  
TCGCCCCGAAGAACGTTTTCCAATGATGAGCACTTTTAAAGTTCTGCTATGTGGCGCGGTATTATCCCGTATTG  
ACGCGGGCAAGAGCAACTCGGTCGCCGCATACATACTTCTCAGAAATGACTTGGTTGAGTACTCACCAGTAC  
AGAAAAGCATCTTACGGATGGCATGACAGTAAAGAAATATGCAAGTCTGCCATAAGTACTGATGATAACAC  
TGCGGCCAACTTACTTCTGACAACGATCGGAGGACCGAAGGAGCTAACCCTTTTTTTCACAACATGGGGGAT  
CATGTAACCTGCCTTGATCGTTGGGAACCGGAGCTGAATGAAGCCATACCAAACGACGAGCGTGACACCACG  
ATGCCTGTAGCAATGGCAACAACGTTGCGCAAACTATTAACCTGGCGAACTACTTACTCTAGCTTCCCGGCAAC  
AATTAATAGACTGGATGGAGGCGGATAAAGTTGCAGGACCACTTCTGCGCTCGGCCCTTCCGGCTGGCTGGTT  
TATTGCTGATAAATCTGGAGCCGGTGAGCGTGGGTCTCGCGGTATCATTGCAGCACTGGGGCCAGATGGTAAG  
CCCTCCCGTATCGTAGTTATCTACACGACGGGCAGTCAGGCAACTATGGATGAACGAAATAGACAGATCGCTG  
AGATAGGTGCCTCACTGATTAAGCATTGGTAACGTGACACCAAGTTTACTCATATATACTTTAGATTGATTTA  
AAACTTCATTTTTAATTTAAAAGGATCTAGGTGAAGATCCTTTTTGATAATCTCATGACCAAAAATCCCTTAACG  
TGAGTTTTCGTTCCACTGAGCGTCAGACCCCGTAGAAAAGATCAAAGGATCTTCTTGAGATCCTTTTTTTCTGC  
GCGTAATCTGCTGCTTGCAAAACAAAAAAACCACCGCTACCAGCGGTGGTTTTGTTGCCGGATCAAGAGCTACC  
AACTTTTTTCCGAAGGTAACCTGGCTTACAGCAGAGCGCAGATACCAAATACTGCTTCTAGTGTAGCCGTAGT  
TAGGCCACCCTTCAAGAACTCTGTAGCACCCGCTACATACCTCGCTCTGCTAATCCTGTTACCAGTGGCTGCT  
GCCAGTGGCGATAAGTCTGTCTTACCGGGTGGACTCAAGACGATAGTTACCGGATAAGGCGCAGCGGTGCTG  
GGCTGAACGCGGGGTTCTGTCACACAGCCAGCTTGGAGCGAAGCAGCACTACACCGAATGAGATACCTACAG  
CGTGAGCATTGAGAAAGCGCCACGCTTCCCGAAGGGAGAAAAGGCGGACAGGTATCCGGTAAGCGGCAGGGTC  
GGAACAGGAGAGCGCACGAGGGAGCTTCCAGGGGGGAACGCCTGGTATCTTTATAGTCTGTGCGGTTTTCGCC  
ACCTCTGACTTGAGCGTCGATTTTTGTGATGCTCGTCAGGGGGGCCGAGCCTATGGA AAAACGCCAGCAACGC  
GGCTTTTTACGGTTCTTGGCCTTTTGTGCTCAGATGTTCTTCTCGCTTATCCCTGATTCTGTG

GATAACCGTATTACCGCCTTTGAGTGAGCTGATACCGCTCGCCGACGCCGAACGACCGAGCGCAGCGAGTCA  
GTGAGCGAGGAAGCGGAAGAGCGCCCAATACGCAAACCGCCTCTCCCCGCGGTTGGCCGATTCAATTAATGC  
AGCTGGCAGCAGAGGTTTCCCAGCTGGAAGCGGGCAGTGAGCGCAACGCAATTAATGTGAGTTACCTCACT  
CATTAGGCACCCAGGCTTTACACTTTATGCTTCCGGCTCCTATGTTGTGTGGAATTGTGAGCGGATAACAAAT  
TCACACAGAAACAGCTATGACCATGATTACGCCAAGCTCGGAATTAACCCCTCACTAAAGGGAACAAAAGT  
GGGTACCCGACAGGTTATCAGCAACAACACAGTCATATCCATTCTCAATTAGCTCTACCACAGTGTGTGAACC  
AATGTATCCAGCACCACCTGTAACCAAAAACAATTTTAGAAGTACTTTCACTTTGTAAGTACTGAGCTGTCATTTATA  
TTGAATTTTCAAAAATTTACTTTTTTTTTGGATGGACGCAAAGAAGTTTAATAATCATATTACATGGCATT  
CCACCATATACATATCCATATACATATCCATATCTAATCTTACTTATATGTTGTGGAAATGTAAAGAGCCCCAT  
TATCTTAGCCTAAAAAACCTTCTCTTTGGAACCTTCAGTAATACGCTTAACTGCTCATTGCTATATTGAAGTA  
CGGATTAGAAGCCCGGAGCGGGTGACAGCCCTCCGAAGGAAGACTCTCTCCGTGCGTCCCTCGTCTTCCCG  
GTCGCGTTCTGAAACGAGATGTGCCTCGCGCCGACTGCTCCGAACAATAAAGATTCTACAATACTAGCT  
TTATGGTTATGAAGAGGAAAAATTGGCAGTAACCTGGCCCCACAAACCTTCAAATGAACGAATCAAATTAAC  
AACCATAGGATGATAATGCGATTAGTTTTTAGCCTTATTTCTGGGGTAATTAATCAGCGAAGCGATGATTTTT  
GATCTATTAACAGATATATAAATGCAAAAACCTGCATAACCACTTAACTAATACTTTCAACATTTTCGGTTTTG  
ATTACTTCTTATTCAAATGTAATAAAGATCGAATTCTACTTCATACATTTTCAATTAAG (Open reading frame)

**Aga-HA-W2742S-TycB3-A-T-c-myc** (ORF of pCTRB-W2742S-TycB3 A-T with the start codon in bold)

ATGCAGTACTTCGCTGTTTTTCAATATTTTCTGTTATTGCTTCAGTTTTAGCACAGGAACTGACAACATATATGC  
GAGCAAATCCCCTACCAACTTTAGAATCGACGCCGACTCTTTGTCAACGACTACTATTTTGGCCAACGGGA  
AGGCAATGCAAGGAGTTTTTGAATATTACAAATCAGTAACGTTTGTGAGTAATTGCGGTTCTCACCCCTCAAC  
AACTAGCAAAGGCAGCCCCATAAACACACAGTATGTTTTAAGGACAATAGCTCGACGATTGAAGGTAGATA  
CCCATACGACGTTCCAGACTACGCTCTGCAGGCTAGTGGTGGTGGTGGTGGTGGTGGTGGTGGTGGTGGTGGT  
GGTGGTGGTGGTGGTGGTGGTGGTGGTGGTGGTGGTGGTGGTGGTGGTGGTGGTGGTGGTGGTGGTGGTGGT  
AGCTGGCGAAAAAATGCCTGAGCACACGGCGCTCGTATTGAAAGAAAAAGCGCATGTCGTTCCGGGAGCTCA  
ATGAAAGAGCGAACCAGCTCGCAGCCGTTTTGCGGAAAAAAGGAGTCGGGCCAGCGCAGATCGTCGCTTTGC  
TGGTAGAGCGTTCCGCCGAGATGGTCATTGCCACGCTTCCACGTTAAAAGCGGGCGGCGCTTTTTGCCCGT  
CGATCCTGATTATCCGGAAGAGCGAATCCGCTACATGCTGGAGGACAGCCAGGCAAACTGGTGGTGACCCA  
TGCGCACTTGCTGCACAAAGTGAGCAGTCAGTCCGAAAGTCGTTGATGTGGATGACCCTGGAAGCTACGCAACA  
CAGACAGACAACCTGCCGTGCGCAAAACACACCGTCTGATTTGGCTTATATCATTACACGTCGCGGTACGACGG  
GCAAGCCAAAAGCGTCATGCTGGAGCACAAAGGGTAGCGAATCTGCAAGCGGTTATTTGCCATCATCTAGG  
GCGTCAGCGCCGCAAGATCGGGCAGGGCATTGTCAGCATCTCGTTGACGCATCGGTGTCGGATATGTTTTGG  
CCCGTTGCTGTCGGGAGCGACCTTGTACGTTCTGTCGAGACGTCATCAACGATTTTCAACGATTTCGCCGAAT  
ACGTTCCGCGATAACGCGATCACCTTCTCACTTTGCCGCCGACGTACGCGATTTATCTGGAGCCGGAGCAGGT  
GCCGTCGTTACGCACCCGTGATTACAGCCGGATCGGCTTCTCCGTTGCATTGGTGGATAAATGGAAGAAAA  
GTCACCTATGTCAATGGATACGGCCAAACAGAGAGCACCCTTTCGCGCAGACTGTGGAAAGCCAAACCGGAT  
GAGCCAGTCGAAACGATCACGATTGGCAAACCGATTGAGAACACCAAGCTGTACATCGTGGATGACCAGTTG  
CAGTTGAAAGCGCCGGCAGATGGGAGAAGTGTGCATCAGCGGCTTGTGCTGGCAGAGGCTATTGGAAT  
CGTCCAGAGCTGACCGCCGAGAAGTTCGTCGACAACCCGTTTGTGCCAGGAACAAAGATGTACCGGACAGGC  
GACCTGGCAAGATGGCTGCCAGATGGAACATCGAGTATCTGGGCAGAATCGATCACCAAGTGAATAATTCGC  
GGACATCGTGTGAAACTCGGCCAAGTGGAAGCGTGTGCTGCGGTATGACACGGTCAAAGAGGCGGCCGCC  
ATCACACATGAGGACGACCGCGGCCAAGCTTACTTGTGCGCCTACTACGTAGCGGAGGGAGAAGCCACGCT  
GCGCAACTTCGAGCCTATATGGAACAGGTTGCCGAACTACATGGTTCCCGCCTTCTTATCCAGTTGGAAA  
AGATGCCGCTGACACCGAATGACAAGATTGACCGAAAAGCGCTGCCGAAGCCGAACCAGGAGGAGAACCAG  
ACTGAGCAATATGCGAGCGCCGCAACCGACTGGAACAGTTGCTGGCTGGCATCTGGGCAGATGTACTGGGG  
ATCAAGCAATGCGAGCGCAAGACAACTTTGAAATGGCGCGGATTTCGATTAAAGCGATCCAGGATCCA  
CCCGCTGAATGCGTCAGGCTGGACGCTTGCAGTAAAGAACTGTTCCAGTACCCGACGATTGAAGAAGCTGC  
TCTGCGGTCATCCCGAACAGCCGAGAGAGCGAGCGAGGGTGTCTCGAG**GAACAAAAGCTTATTTCTGAAG**  
**AGGACTTG**

**Aga-HA-W2742S-TycB3-C-A-T-c-myc** (ORF of pCTRB-W2742S-TycB3 C-A-T with the start codon in bold)

ATGCAGTACTTCGCTGTTTTTCAATATTTTCTGTTATTGCTTCAGTTTTAGCACAGGAACTGACAACATATATGC  
GAGCAAATCCCCTACCAACTTTAGAATCGACGCCGACTCTTTGTCAACGACTACTATTTTGGCCAACGGGA  
AGGCAATGCAAGGAGTTTTTGAATATTACAAATCAGTAACGTTTGTGAGTAATTGCGGTTCTCACCCCTCAAC  
AACTAGCAAAGGCAGCCCCATAAACACACAGTATGTTTTAAGGACAATAGCTCGACGATTGAAGGTAGATA  
CCCATACGACGTTCCAGACTACGCTCTGCAGGCTAGTGGTGGTGGTGGTGGTGGTGGTGGTGGTGGTGGTGGT  
GGTGGTGGTGGTGGTGGTGGTGGTGGTGGTGGTGGTGGTGGTGGTGGTGGTGGTGGTGGTGGTGGTGGTGGT  
TCTTCTGCTCAGCAGCGGATGACTTGTCTCCATCAGCTTGAAGGTGCCGGAATCAGCTACAACACACCGGGCA  
TCATCATGCTGGAAGGCAAGCTCGATCGCAGCAATTGGCGAATGCGCTGCAAGCGTTGGTAGATCGTCACGA  
TATTTTGGCGACGCTTTTTGAGATGGTTCGGAGACGAGCTGGTGCAAAAAATTCATGACCGCGTGGCCGTGAAC  
ATGGAGTATGTGACGGCAGAAGAGCAGCAGATCGATGACCTTTTCCACGCGTTCGTCGCTCCGTTTGATCTTTC  
TGTGCCGCCATTGCTCCGCATGAGCCTGGTGAACCTCGCGGATGAGCGTCACCTGCTCCTGTACGACATGCAC

CATATTGCTGCCGATGCCGCATCGATCACGATCCTGTTTCGATGAACTGGCTGAATTGTACCAGGGAAGAGAAC  
TGCCGGAAATGCGCATCCAGTACAAAGATTTTGTGCTGCTGGCAAAAAGCCTTGCATGAGTCGGATGCCCTTCAA  
GCAGCAGGAAGCGTATTGGTTGAGCACGTTTCGCTGGAATATCACCGCTGTGCATGTGCCGACAGATTTTCCG  
CGCCAGCCGTGAAAAGTTTTGCAGGGGGCAAGTCAACCTGTCCATGGACCAAGAGCTGCTCAGTGTCTTGC  
ACGAGTTGGCTGCGCATACGAATACGACGCTGTTTATGGTTTTGTGCTGGCCGCTACAACGTGCTGCTGCTCAA  
ATACGCTGGCAAGACGACATCATCGTGGGAACGCCGATCTCCGGCAGGTCACGCGCCGAGCTTGCSCCTGTC  
GTCGGCATGTTTCGTCATACGCTGGCGATCCGCAACAAAACCGACCGCCGAGAAGACATTCAAGCAGTTTTTGC  
AGGAGTCAAGCAAAACGCGCTCGATGCTTTTCGACCACCAGGACTACCCGTTTGAAGCCTTGTGGAAAAGC  
TGGGCATTCCGCGCATCCGGGGCGCAATCCGCTGTTTACACCATGTTTCATCCTGCAAAACGATGAGTTGCA  
CGCAAAAACGCTGGATCAGCTCGTCTATCGCCCTTATGAATCGGACAGCGCGCTTACGCTGGCGAAAATTCGAC  
TTGTCGTTCCATCTGACCGAGCGGGAACCCGACTGTTCTTGGCCTGGAATACTGCACCAAGCTGTCAAGC  
AACAAACGGTAGAACCAATGGCGCACACTTCTTGCAAATTTTGCAGCGGTCACGGCCAATCCGGAAAATG  
AATTGCAAGAGATCGAGATGCTGACAGCAGCAGAAAAGCAAATGCTGCTGGTGGCGTTCAACGATAACGACA  
GAGAATACCGGGCAGATCAAAACAATCCAGCAACTTTTTGAAGAGCTGGCGGAAAAAATGCCTGAGCACACGG  
CGCTCGTATTGAAAGAAAAGCGCATGTCGTTCCGGGAGCTCAATGAAAGAGCGAACAGCTCGCAGCCGTTTT  
GCGGGAAAAAGGAGTCGGGCCAGCGCAGATCGTCGCTTTGCTGGTAGAGCGTTCCGCGGAGATGGTCATTGC  
CACGCTTGCCACGTTAAAAGCGGGCGGCGCCTTTTTGCCCGTCGATCCTGATTATCCGGAAAGAGCGAATCCGC  
TACATGCTGGAGGACAGCCAGGCAAAAATGGTGGTGACCCATGCGCACTTGTGCACAAAAGTGAGCAGTCAG  
TCCGAAGTCGTTGATGTGGATGACCCCTGGAAGTACGCAACACAGACAGACAACCTGCCGTGCGCAAAACACA  
CCGTCGTATTGGCTTATATCATTTACACGTCGCGTACGACGGGCAAGCCAAAAGCGCTCATGTGGAGCACA  
AAGGGGTAGCAATCTGCAAGCGGTATTTGCCCATCATCTAGGCGTCACGCCGCAAGATCGGGCAGGGCATT  
TGCCAGCATCTGTTTGCAGCATCGGTGTCGGATATGTTTGGCCCGTTGCTGTCGGGAGCGACCTTGTACGTCT  
TGTCCCAGACGTCATCAACGATTTTCAACGATTTCGCCGAATACGTTTCGCGATAACGCGATCACCTTCCTCACT  
TTGCCGCCGACGTACGCGATTTATCTGGAGCCGGAGCAGGTGCCGTCGTTACGCACCCTGATTACAGCCGGAT  
CGGCTTCTCCGTTGCATTGGTGGATAAATGGAAAGAAAAAGTACCTATGTCAATGGATACGGCCCAACAGA  
GAGCACCGTTTGCAGCACACTGTGGAAGCCAAACCGGATGAGCCAGTCGAAACGATCACGATTGGCAAAC  
GATTCAGAACACCAAGCTGTACATCGTGGATGACCAGTTGCAAGTTGAAAGCGCCGGGCGAGATGGGAGAACT  
GTGCATCAGCGGCTTGTGCTGGCGAGAGGCTATTGGAATCGTCCAGAGCTGACCGCCGAGAAGTTCGTCGAC  
AACCCGTTTGTGCCAGGAACAAAGATGTACCGGACAGGGCAGCTGGCAAGATGGCTGCCAGATGGAACATC  
GAGTATCTGGGCAGAATCGATCACCAGTGAATAATCGCGGACATCGTGTGGAACCTCGGCGAAGTGGAAAGC  
GTGCTGCTGCGGTATGACACGGTCAAAGAGGCGGCCGCATCACACATGAGGACGACCGCGCCAAGCTTAC  
TTGTGCGCCTACTACGTAGCGGAGGGAGAAGCCACGCCTGCGCAACTTCGAGCCTATATGGAAAACGAGTTG  
CCGAACACATGTTTCCCGCCTTCTTATCCAGTTGAAAAGATGCCGCTGACCCGAATGACAAGATTGACC  
GAAAAGCGCTGCCGAAAGCCGAAAGGAGGAGAACCGGACTGAGCAATATGCACCGCGCAACCCGAGCTG  
GAACAGTTGCTGGCTGGCATCTGGGCAGATGTAAGGATCAAGCAAGTCGGGACGCAAGACAACCTTCTTTG  
AATTGGGCGGCGATTGATTAAGCGATCCAGGTATCCACCCGCTGAATGCGTCAGGCTGGACGCTTGCAT  
GAAAGAAGCTTCCAGTACCCGACGATTGAAGAAGCTGCTCTGCGCGTCATCCCGAACAGCCGAGAGAGCGA  
GCAGGGTGTCTCGAGGAACAAAAGCTTATTTCTGAAGAGGACTTG

**Aga-HA-TycC3-A-T-c-myc** (ORF of pCTRB-TycC3 A-T with the start codon in bold)

ATGCAGTTACTTCGCTGTTTTTCAATATTTTCTGTTATTGCTTCAGTTTTTAGCACAGGAACTGACAACTATATGC  
GAGCAAATCCCCTACCAACTTTAGAATCGACGCCGACTCTTTGTCAACGACTACTATTTTGGCCAACGGGA  
AGGCAATGCAAGGAGTTTTTGAATATTACAAATCAGTAACGTTTGTGAGTAATTGCGGTTCTCACCCCTCAAC  
AACTAGCAAAGGCAGCCCATAAACACACAGTATGTTTTAAGGACAATAGCTCGACGATTGAAGGTAGATA  
CCCATACGACGTTCCAGACTACGCTCTGCAGGCTAGTGGTGGTGGTGGTGGTGGTGGTGGTGGTGGTGGTGGT  
GGTGGTGGTGGTGGTGGTGGTGGTGGTGGTGGTGGTGGTGGTGGTGGTGGTGGTGGTGGTGGTGGTGGTGGT  
AACAAGCGAAAAGTCGCCGACGCAACAGCCGTGGAATCAACGCGGACGCCCTGTCTTACAGGAGCTGA  
ATGAGCGAGCCAACCAGCTTCCGCTACGCTGCGGGAGCGGGAGTACAGCCTGACCAACCTGTAGGGATTA  
TGGCGAACCGCTCTGTGGAGATGGTCTGCGCATCCTCGCCATCTTGAAGCAGGCGGAGCTTACGTGCCGAT  
CGACCCGGAATATCCGGAGGAGCGTGTGCGCTACATGCTGACGGATTGCCAAGCCCGCCTGGTGTGACGCA  
AAAGCATCTGGGAGCGAAGCTTGGTTCCAGCGTGACCGCGAATGCCTGTATCTCGACGACGAGAGCAACTA  
TGGTGTGACCCGCTCGAATTTGCAGCCGATCAATACCGCTTCCGATCTGGCTTACATCATCTACACATCGGGTA  
CGACTGGCAAGCCAAAAGGGTCAATGGTTCGAGCACCCGGGATCGTCAACAACGTCGTGTGGAAGAAAAGCGG  
AGTACCAAATGAAGTTGGCGACAGAAGCTTGTGCTCTGTCCTTTGCTTTGCTTTGCTTTGCTTTGCTTTGCTTT  
TTACGCTGTGCTTTCCGGGGCAACTGTCGTAAGGCGGAGGATGAAGAAGCCAAGGACCCAGTCTCTTTGAA  
AAAGCTCATCGCCGCTTCGCGCTGCACCTTGTGACAGGCGTGCCGAGCTTGTCCAGGCCATTCTGGAATGC  
AGCACGCCAGCGGATATCCGTCGCTGCAAAACCGTCACTCGGCGGAGAAAAAATTACGGCGCAGCTTGT  
GAAAAATGCAAGCAGCTGAATCCCGATCTGGTCACTGCAACGAGTACGGCCGACAGAAAAGCAGTGTGCTG  
GCCACCTGGCAGCGCCTTGCGGGTCCGGATGCTGCCATCACCATCGGGCGGCGGATTGCCAACACCAGCCGT  
ACATCGTGAACCAATATACACAGCTACAGCAATCGGCGTGGTGGTGGGAGATTTGCATCGGCGGCCCGCTT  
GGCAGAGGCTATTGGAACAAGCCAGCGCTACGGAAGAGAAGTTGCTTTCCCATCCGTTTGCAGGAGGCGA  
GCGCATGTACAAGACGGGCGATCTTGGCAAGTGGCTCCCGGACGGAACGATTGAATACATTGGGCGCATCGA  
CGAACAGTCAAAGTCCGAGGCTACCGAATTGAAATCGGCGAGATCGAGTCGGCTCTGCTGGCTGCGGAAAA  
GCTGACAGCGGCTGTTGTGGTCTGCTATGAGGATCAGCTTGGCCAGTCGGCTCTGGCAGCGTATTTACCGCC  
GACGAACAGCTTGTGTCACGAAGCTGTGGTTCGATCTGTCGAAGCGACTCCCGTCGTACATGATTCTGCGC

ATTTTGTGCAGCTCGATCAGCTTCCGCTTACGCCAAACGGCAAAGTCGACAAGAAAGCCTTGCCGAAGCCAGA  
AGGCAATGCCCGTAACCGAAGCGCAATATGTCGCGCCGACAAATGCGGTGAAAGCAAGCTGGCAGAGATTTG  
GGAACGCGTGCTCGGGGTTAGCGGCATCGGCATTCTCGACAACTTTTCCAGATCGGCGGACATTCCTTGAAA  
GCGATGGCTGTCGTGCACAGGTGCATCGCGAGTATCAGGTTGAGCTTCCGCTGAAAGTGTCTGTCGCGCAGC  
CTACGATCAAGGCGTGGCCCAGTATGTCCACGAGCGGAAAAGAGACGTATGTGCCGATCCTCGAGGAAC  
AAAAGCTTATTTCTGAAGAGGACTTG

**Aga-HA-TycC6-C-A-T-c-myc** (ORF of pCTRB-TycC6 C-A-T with the start codon in bold)

ATGCAGTTACTTCGCTGTTTTTCAATATTTTCTGTTATTGCTTCAGTTTTTAGCACAGGAACTGACAACCTATATGC  
GAGCAAATCCCCTACCAACTTTAGAATCGACGCCGACTCTTTGTCAACGACTACTATTTTGGCCAAACGGGA  
AGGCAATGCAAGGAGTTTTTGAATATTACAAATCAGTAACGTTTGTAGTAATTGCGGTTCTCACCCCTCAAC  
AACTAGCAAAGGCAGCCCATAAAACACACAGTATGTTTTAAGGACAATAGCTCGACGATTGAAGGTAGATA  
CCCATACGACGTTCCAGACTACGCTCTGCAGGCTAGTGGTGGTGGTGGTTCTGGTGGTGGTGGTTCTGGTGGT  
GGTGGTTCTCATATGGCCAAAGGGAATGTCTTCTCGATCGAGCCTGTGCAAAAGCAAGCGTACTATCCGGTCT  
CCTCGGCACAAAAGCGCATGTACATCTCGATCAATTTGAGGGAGTCGGCATCAGCTACAACATGCCGTGAC  
TATGCTGATCGAAGGCAAGCTGGAGCGAACACGGGTAGAAGCGGCGTTCCAGCGCTTGATTGCGCGACATGA  
AAGCCTGCGCACTTCGTTTCCGTCGTCACGGAGAGCCTGTGCAAAACATTACAGGAGGACGTTCCGTTTGGC  
CTTGCTATTCCGGAAGTACAGAACAGGAGGCGCGCAACTCTGTTTCTCTGTCGAGCCGTTGATCCTGATCG  
AGGTCGCAACACTCATCCGCGTGTCTGCTGAAAATCGGCGAGGATCGTTACGTGCTCTTACCGACATGCA  
TCACAGCATTTCCGATGGCGTATCCTCCGGCATTCTTTTTGGCAGAGTGGGTGACGCTGTACCAGGTTGACGTT  
TGCCGGAGCTGCGTATCCAGTACAAGGACTTTGCTGTGTGGCAACAAGAGTTTTCCAGTCGGTGCCTTCCA  
CAAGCAGGAAGCGTACTGGTTGCAAACGTTTGGCGATGACATTCTGTGCTGAACTTGCCGACCGATTTACC  
CGCCCCAGCACCCAAAGCTTTGCCGGGGATCAGTGCACGATCGGCGCGGGCAAAAGCGTACCGGAAGGCTTG  
CACCAGTTGGCGCAGGCGACGGGAACGACTTTGTACATGGTTTTTCTGCCGCGTACAACGTGTGCTCGCCA  
AGTATGCCGGGAGGAGACATCATCGTCGGCACGCCGATTACAGGCAGATCCCATGCCGATCTCGAACC  
TCGTCGGCATGTTCTGTGAACACCTTGGCGATGCGAAAACAACCGCAGCGCGAAAAGACTTTTAGCGAGTTTT  
GCAAGAAGTCAAGCAAAATGCGCTGGATGCGTACGGCCATCAGGATTACCCGTTTGAAGAAGTGGTGGAAAA  
GCTCGCATCGCGCGGATTTGAGCCGAAATCCGCTGTTGACACCGTGTTCAGTTCCAAAACAGCAGCGGAA  
GAGGTCATGACGCTGCCTGAATGCACGTTGCGCCGTTTATGACGGACGAAACAGGCCAGCAGCCAAGTTC  
GACTTGACTTTCAGCGCTACGGAAGAGCGGGAAGAAATGACGATTGGCGTGGAGTACAGCACAAGCTTGTT  
ACGCGGAAACGATGGAACGGTTTCAGCCGCACTCTCTGACGATTGTCAGCGAGCCTGTGCAAAATCCGCA  
ATCCGCTGCGGAGATCGACATGCTTTTTGCCAGAGAATAACAGCAGATTTTGGCCGGTTCAACGATACGG  
CAGTCAGCTATGCGCTGGACAAAACGCTGACCAGATTTGAAAGAGCAGGTGACAAAACCCGATCAGG  
CAGCGCTTCTCTTGTAGCGAGCAATCGCTGACGTACAGCGAACTGAACGAGCGAGCAAACAGACTGGCAAGGG  
TCCTGCGCGCAAAGGAGTCGGACCGGACCCTGTTGTTAGCGATCATGGCGGAGCGCTCGCCGAAATGGTGA  
TCGGTATTCTCGGTATTTTGAAGGCAGCGCGCTTATGTTCCCGTCGATCCCAGGTATCCGCAAGAGCGCATT  
CAGTACCTGCTCGAAGATAGCAACCGCAGCCCTGCTGCTCAGCCAGGCGCATCTGTTGCCGCTGTTGGCCAGG  
TGTCAAAGCGAGCTGCCGGAGTGCCTTGATCTGAACGCTGAACTGGATGCCGGACTGAGCGGTCCAACCTGCC  
AGTGTCAACCAACCGACTGACCTTGCTTGCCTACGTATCTATACATCCGGTACGACCGGAAGCGGAGGTTGTC  
ATGATCCCGCATCAAGGAATCGTGAATGCTTGCAGTGGAGAAGAGAGCAATAACGGTTCGGGCGGATGAC  
AAGGCGTGTGCAAGTGTCTCTTTGCCCTTCGACGGTTTTGTAGCCAGCTTGTTCGCTCCGCTGCTCGGAGGGG  
AACGTGCGTGTGCGCAAGAAGCAGCTGCCAAAGACCCGGTCGCGCTGAAAAAACTGATGGCCGCAACCGGA  
AGTCACCCATTAACGCGCTACCGAGTCTGTTCCAGGCCATTCTCGATTGCTCGACGACAACCGACTTCAATC  
AGTTGCGTTGCGTCACTTTGGGCGCGGAGAAGCTGCTGTCAGCTTGTGCAAAAACAAGGAAAAGCAGT  
CGGCAATCGAGATCAACAACGAGTACGGCCCCAGGAAACAGCGTCTCACCACCTCTCGCGCTCGATTG  
AAGCGGGCAAGCAGTACGATTTGGCCAGCCGTTGCCAACGTCGCAAGTCTACATTGTAGATGAGCAGCATC  
ACTTGCAGCCGATTGCGTGGTGGTGGTGGTGGTGGTGGTGGTGGTGGTGGTGGTGGTGGTGGTGGTGGTGGTGG  
ACCGGAGCTGACCGCAGAGAAGTTTTGTGCAAAATCCGTTCCGACCAGGCGAGCGCATGTACAAAACAGGCGA  
CTTGGTAAAAATGGCGGACGGATGGCACGATCGAGTACATCGGCCGCGCAGACGAACAGGTCAAGGTGAGAGG  
GTATCGCATCGAGATCGGCGAGATCGAGAGCGCCGACTCGCTTACCAGGGCATCGATCAAGCGGTGGTCTGT  
GCGCGAGACGATGACGCTACGGCTGGTTTCTATCTTTGCGCTACTTTGTGCGAGCAACAGCCGTGTCCGTATC  
CGGCTTGAAGCCATCTGGCCAAAGAGCTGCTTGCATGATTCCGAGCTATTTCTGTCGAGCTGGATCAG  
CTGCCGTTTTCCGCAATGGAAAAGTGGATCGCAAAGCTTTGCCGAAAGCCGCAACAGTCCGATGCGACCAGC  
CGCAATACGTGGCCCGAGGAATGCGACCGAACAGCAACTGGCAGCCATCTGGCAAGAAGTTTTGGGAGTAG  
AGCAATCGGCATCACCGACCAGTTCTTTGAACTCGGAGGACATTCCTAAAAGCTACGCTGTTGATTGCCAA  
AGTGATGAGTACATGCAAATCGAGCTGCCGCTGAATCTCATCTTCCAGTATCCGACGATCGAAAAGGTGGCC  
GATTTTCATCACGCATAAGCGCTTTGAGAGCAGATACGGCACAGCCATTTTGTTACTCGAGGAACAAAAGCTT  
ATTTCTGAAGAGGACTTG

**Aga-HA-TycB2-A-T-c-myc** (ORF of pCTRB-TycB2 A-T with the start codon in bold)

ATGCAGTTACTTCGCTGTTTTTCAATATTTTCTGTTATTGCTTCAGTTTTTAGCACAGGAACTGACAACCTATATGC  
GAGCAAATCCCCTACCAACTTTAGAATCGACGCCGACTCTTTGTCAACGACTACTATTTTGGCCAAACGGGA  
AGGCAATGCAAGGAGTTTTTGAATATTACAAATCAGTAACGTTTGTAGTAATTGCGGTTCTCACCCCTCAAC

AACTAGCAAAGGCAGCCCCATAAACACACAGTATGTTTTTAAGGACAATAGCTCGACGATTGAAGGTAGATA  
CCCATACGACGTTCAGACTACGCTCTGCAGGCTAGTGGTGGTGGTGGTTCGGTGGTGGTGGTTCGGTGGT  
GGTGGTTCATATGCACTTCAACGACACGGCCGCCCTGTATCCAGCGGAGAGCACGCTGTGCGAGCTGTTTG  
AAGATCAGGCACAGAAAACCTCTGAGCAAACCGCCGTCGTCTTCGGTGACAAACGACTGACGTACCCGCGAAC  
TGAACGAGCGGGCCAAACAGCTCGCGCACACTTTGCGGGCAAAGGCGTGCAGGCTGAGCAAAGCGTAGGGA  
TCATGGCGCAAAGATCGTTAGAGATGGCGATCGGAATCATCGCTATTCTCAAAGCGGGCGGGCGTATGTGCC  
GATCGATCCGGATTATCCGAATGAGCGGATTGCTTACATGCTGGAAGATTGCGAAGCCCGTCTGGTGTGACC  
CAGCAGCAGCTCGCCGAAAAGATGACCGCAAACGTGGAATGCCTGTATCTGGATGAGGAGGGCAGCTACTCG  
CCTCAGACGGAACATCGAGCCGATCCATACCGCTGCTGATCTCGCTTACATCATCTACACATCCGGTACGA  
CAGGCAGGCCAAAAGGCGTCATGGTAGAGCATCGGGGAATCGTCAACAGTGTGACGTGGAACAGGGACGAGT  
TTGCCCTTTCTGTCCGGGACAGTGGAACGCTGTCGCTATCTTTTGCCTTCGATGCCTTTGCCCTTACTTTCTTTA  
CGTTGATTGTATCAGGCTCCACGGTCTGCTGATCGCGGATCACGAAGCCAAAGATCCGATCGCGCTACGCAA  
CCTGATTGCCGCTTGGGAATGCAGCTACGTCGTTTTCTGTCGCCAGTATGTTCCAGGCATATTGGAGTGCAGCA  
CTCCGGCAGACATCCGCTCCATCCAGGCAGTCATGCTCGGGGCGAAAAGCTGTGCGCCGAAGCTTGTTACGCT  
GTGCAAAGCGATGCATCCGAGATGAGCGTGATGAATGCATACGGCCCGACGGAGAGCAGCGTCATGGCCAC  
CTACCTGCGAGATACACAGCCAGATCAGCCGATCACCATCGGGCGGCCGATTGCCAACACCGCCATTACATC  
GTAGACCAGCACCATCAACTGCTGCCTGTGCGGGTGGTAGGGGAAATCTGCATCGGCGGTACAGGCTTGCGCG  
GGGGCTATTGGA AAAAGCCGGAGCTTACTGCGGAGAAATTCGTGGCCAATCCAGCTGTTCCGGGAGAGCGCA  
AATCAAAAACAGGCGATCTGGGCAGATGGCTCCACGACGGCAGGATGATTTTATAGGCCGCGTCGATGACCA  
AATCAAGGTGAGAGGATACCGGATTGAGGTGCGGGAGATTGAAGCGTTTTGCTCGCTTACGATCAGACGAA  
TGAAGCTATCGTCGTCGCTTATCAGGACGATCGCGGCGATTCTATCTGGCTGCGTATGTCACGGGAAAAACG  
GCGATAGAGGAATCCGAGCTTCGCGCGCATCTGTTGCGAGAGCTTCCGGCCTACATGGTGCCGACCTACCTGA  
TTCAACTGGACGCTTTCCCGCTCAGCCAAACGGCAAGGTCGACCGCAAGGCAAGGCAAGCCGGAAGGAA  
AGCCTGCAACAGGAGCAGCTTATGTCGCACCCGCTACAGAAGTGGAGGCGAAGCTGGTGCCTATTGGGAGA  
ATGCGCTGGGGATTTCGGCGTTCGGGGTGTGGATCACTTTTTTGGAGCTGGGCGGTCATTCTTGAAGCGGAT  
ACGGTTGTGGCGCAAGTGCATCGCGAGTTCAAATCGACCTTTTGTGAAGCAGTTTTTTCGACGCGCAACCAT  
CCGGGACTTGGCCCGCTTGATCGAACATAGCGAACAGGCAGCCGGCGCCGCCATTCTCGAG**GAACAAAAGCT**  
**TATTCTGAAGAGGACTTG**

**Aga-HA-M1768A/M1803I-TycB2-A-T-c-myc** (ORF of pCTR B-M1768A/M1803I-TycB2 A-T with the start codon in bold)

ATGCAGTACTTCGCTGTTTTTCAATATTTTCTGTTATTGCTTACGTTTTAGCACAGGAACTGACA ACTATATGC  
GAGCAAATCCCCTACCAACTTTAGAATCGACGCCGACTCTTTGTCAACGACTACTATTTTGCCAACGGGA  
AGGCAATGCAAGGAGTTTTTGAATATTACAAATCAGTAACGTTTGTGAGTAATTGCGGTTCTACCCCTCAAC  
AACTAGCAAAGGCAGCCCCATAAACACACAGTATGTTTTTAAGGACAATAGCTCGACGATTGAAGGTAGATA  
CCCATACGACGTTCAGACTACGCTCTGCAGGCTAGTGGTGGTGGTGGTTCGGTGGTGGTGGTTCGGTGGT  
GGTGGTTCATATGCACTTCAACGACACGGCCGCCCTGTATCCAGCGGAGAGCACGCTGTGCGAGCTGTTTG  
AAGATCAGGCACAGAAAACCTCTGAGCAAACCGCCGTCGTCTTCGGTGACAAACGACTGACGTACCCGCGAAC  
TGAACGAGCGGGCCAAACAGCTCGCGCACACTTTGCGGGCAAAGGCGTGCAGGCTGAGCAAAGCGTAGGGA  
TCATGGCGCAAAGATCGTTAGAGATGGCGATCGGAATCATCGCTATTCTCAAAGCGGGCGGGCGTATGTGCC  
GATCGATCCGGATTATCCGAATGAGCGGATTGCTTACATGCTGGAAGATTGCGAAGCCCGTCTGGTGTGACC  
CAGCAGCAGCTCGCCGAAAAGATGACCGCAAACGTGGAATGCCTGTATCTGGATGAGGAGGGCAGCTACTCG  
CCTCAGACGGAACATCGAGCCGATCCATACCGCTGCTGATCTCGCTTACATCATCTACACATCCGGTACGA  
CAGGCAGGCCAAAAGGCGTCATGGTAGAGCATCGGGGAATCGTCAACAGTGTGACGTGGAACAGGGACGAGT  
TTGCCCTTTCTGTCCGGGACAGTGGAACGCTGTCGCTATCTTTTGCCTTCGATGCCTTTGCCCTTACTTTCTTTA  
CGTTGATTGTATCAGGCTCCACGGTCTGCTGATCGCGGATCACGAAGCCAAAGATCCGATCGCGCTACGCAA  
CCTGATTGCCGCTTGGGAATGCAGCTACGTCGTTTTCTGTCGCCAGTATGTTCCAGGCATATTGGAGTGCAGCA  
CTCCGGCAGACATCCGCTCCATCCAGGCAGTCGCGCTCGGGGCGAAAAGCTGTGCGCCGAAGCTTGTTACGCT  
GTGCAAAGCGATGCATCCGAGATGAGCGTGATGAATGCATACGGCCCGACGGAGAGCAGCGTCATTGCCAC  
CTACCTGCGAGATACACAGCCAGATCAGCCGATCACCATCGGGCGGCCGATTGCCAACACCGCCATTACATC  
GTAGACCAGCACCATCAACTGCTGCCTGTGCGGGTGGTAGGGGAAATCTGCATCGGCGGTACAGGCTTGCGCG  
GGGGCTATTGGA AAAAGCCGGAGCTTACTGCGGAGAAATTCGTGGCCAATCCAGCTGTTCCGGGAGAGCGCA  
TGTACAAAACAGGCGATCTGGGCAGATGGCTCCACGACGGCAGGATGATTTTATAGGCCGCGTCGATGACCA  
AATCAAGGTGAGAGGATACCGGATTGAGGTGCGGGAGATTGAAGCGTTTTGCTCGCTTACGATCAGACGAA  
TGAAGCTATCGTCGTCGCTTATCAGGACGATCGCGGCGATTCTATCTGGCTGCGTATGTCACGGGAAAAACG  
GCGATAGAGGAATCCGAGCTTCGCGCGCATCTGTTGCGAGAGCTTCCGGCCTACATGGTGCCGACCTACCTGA  
TTCAACTGGACGCTTTCCCGCTCAGCCAAACGGCAAGGTCGACCGCAAGGCAAGGCAAGCCGGAAGGAA  
AGCCTGCAACAGGAGCAGCTTATGTCGCACCCGCTACAGAAGTGGAGGCGAAGCTGGTGCCTATTGGGAGA  
ATGCGCTGGGGATTTCGGCGTTCGGGGTGTGGATCACTTTTTTGGAGCTGGGCGGTCATTCTTGAAGCGGAT  
ACGGTTGTGGCGCAAGTGCATCGCGAGTTCAAATCGACCTTTTGTGAAGCAGTTTTTTCGACGCGCAACCAT  
CCGGGACTTGGCCCGCTTGATCGAACATAGCGAACAGGCAGCCGGCGCCGCCATTCTCGAG**GAACAAAAGCT**  
**TATTCTGAAGAGGACTTG**

**pTrc99a-M1768A/M1803I-TycB-His** (The TycB start codon is in bold)

CTAGAGTCGACCTGCAGGCATGCAAGCTTGGCTGTTTTGGCGGATGAGAGAAGATTTTCAGCCTGATACAGAT  
TAAATCAGAACGCAGAAGCGGTCTGATAAAACAGAATTTGCCTGGCGGCAGTAGCGCGGTGGTCCCACCTGA  
CCCCATGCCGAACTCAGAAGTGAAACGCCGTAGCGCCGATGGTAGTGTGGGGTCTCCCCATGCGAGAGTAGG  
GAACTGCCAGGCATCAAATAAAACGAAAGGCTCAGTCGAAAGACTGGGCCTTTCGTTTTATCTGTTGTTTGTCTC  
GGTGAACGCTCTCCTGAGTAGGACAAATCCGCCGGAGCGGATTTGAACGTTGCGAAGCAACGGCCCCGGAGG  
GTGGCGGGCAGGACGCCCCGATAACTGCCAGGCATCAAATTAAGCAGAAGGCCATCCTGACGGATGGCCT  
TTTTGCGTTTTCTACAACTCTTTTGTATTATTTTCTAAATACATTCAAATATGTATCCGCTCATGAGACAATAAC  
CCTGATAAATGCTTCAATAATATTGAAAAAGGAAGAGTATGAGTATTCAACATTTCCGTGTCGCCCTTATTCCC  
TTTTTTCGGGCATTTTGCCTTCCTGTTTTTGTCTACCCAGAAAACGCTGGTGAAAAGTAAAAGATGCTGAAGATCA  
GTTGGGTGCACGAGTGGGTACATCGAACTGGATCTCAACAGCGGTAAGATCCTTGAGAGTTTTCGCCCCGAA  
GAACGTTTTCCAATGATGAGCACTTTTAAAGTCTGCTATGTGGCGCGGTATTATCCCGTGTGACGCCGGCA  
AGAGCAACTCGGTCGCCGCATACACTATTCTCAGAATGACTTGGTTGAGTACTACCAGTCACAGAAAAGCAT  
CTTACGGATGGCATGACAGTAAGAGAATTATGCAGTGTGCCATAACCATGAGTGATAAACTGCGGCCAACT  
TACTTCTGACAACGATCGGAGGACCGAAGGAGCTAACCGCTTTTTTGCACAACATGGGGGATCATGTAACCTCG  
CCTTGATCGTTGGGAACCGGAGCTGAATGAAGCCATACCAAACGACGAGCGTGACACCACGATGCCTACAGC  
AATGGCAACAACGTTGCGCAAACCTATTAACCTGGCGAACTACTTACTTAGCTTCCCGGCAACAATTAATAGAC  
TGGATGGAGGCGGATAAAGTTGCAGGACCACTTCTGCGCTCGGCCCTTCCGGCTGGCTGGTTATTGCTGATA  
AATCTGGAGCCGGTGAGCGTGGGTCTCGCGGTATCATTGCAGCACTGGGGCCAGATGGTAAGCCCTCCCGTAT  
CGTAGTTATCTACACGACGGGGAGTCAGGCAACTATGGATGAACGAAATAGACAGATCGTGTAGATAGGTGC  
CTCACTGATTAAGCATTGGTAACTGTCAGACCAAGTTTACTCATATATACTTTAGATTGATTTAAAACCTTCATT  
TTTAATTTAAAAGGATCTAGGTGAAGATCCTTTTTGATAATCTCATGACCAAAAATCCCTAACGTGAGTTTTTCG  
TTCCACTGAGCGTCAGACCCCGTAGAAAAGATCAAAGGATCTTCTTGAGATCCTTTTTTCTGCGCGTAATCTG  
CTGCTTGCAAACAAAAAACCCAGCTACCAGCGGTGGTTTTGTTTGGCGGATCAAGAGCTACCAACTTTTTT  
CCGAAGGTAACGGCTTCAGCAGAGCGCAGATACCAATACTGCTCTTAGTGTAGCCGTAGTTAGGCCACC  
ACTTCAAGAACTCTGTAGCACCGCTACATACCTCGCTCTGCTAATCCTGTTACCAGTGGCTGCTGCCAGTGGC  
GATAAGTCGTGTCTTACCGGTTGGACTCAAGACGATAGTTACCGGATAAGGCGCAGCGGTGCGGGCTGAACG  
GGGGTTCGTGCACACAGCCAGCTTGGAGCGAACGACCTACACCGAACTGAGATACCTACAGCGTGAGCTA  
TGAGAAAGCGCCACGCTTCCCGAAGGGAGAAAGGCGGACAGGTATCCGGTAAGCGGCAGGGTTCGGAACAGG  
AGAGCGCACGAGGGAGCTTCCAGGGGAAACGCTGGTATCTTTATAGTCTGTCGGGTTTCGCCACCTCTGA  
CTTGAGCGTCGATTTTTGTGATGCTCGTCAGGGGGCGGAGCCTATGGAAAAACGCCAGCAACGCGGCCTTTT  
TACGGTTCTGGCCTTTTGTGGCCTTTTGTCTACATGTTCTTTCTGCGTTATCCCCTGATTCTGTGGATAACC  
GTATTACCGCCTTTGAGTGAGCTGATACCGCTCGCCGACGCCGAACGACCGAGCGCAGCGAGTCAGTGAGCG  
AGGAAGCGGAAGAGCGCCTGATGCGGTATTTTCTCCTTACGCATCTGTGCGGTATTTACACCCGCATATGGTG  
CACTCTCAGTACAATCTGCTCTGATGCCGCATAGTTAAGCCAGTATAACTCCGCTATCGCTACGTGACTGGGT  
CATGGCTGCGCCCCGACACCCGCCAACACCCGCTGACGCGCCCTGACGGGCTTGTCTGCTCCCGGCATCCGCT  
TACAGACAAGCTGTGACCGTCTCCGGGAGCTGCATGTGTCAGAGTTTTTACCCTCATCACCGAAACGCGCGA  
GGCAGCAGATCAATTCGCGCGCGAAGGCGAAGCGGCATGCATTTACGTTGACACCATCGAATGGTGCAAAAC  
CTTTCGCGGTATGGCATGATAGCGCCCGGAAGAGAGTCAATTCAGGGTGGTGAATGTGAAACCAGTAACGTTA  
TACGATGTCGACAGATATGCCGGTGTCTCTTATCAGACCGTTTTCCCGCTGGTGAACCAGGCCAGCCACGTTT  
CTGCGAAAACGCGGGAAAAAGTGGAAGCGGCGATGGCGGAGCTGAATTACATTCCAACCGCTGGCACAAC  
AACTGGCGGGCAAACAGTCTGTTGCTGATTGGCGTTGCCACCTCCAGTCTGGCCCTGCACGCGCCGTCGCAAAAT  
TGTCGCGGCGATTAAATCTCGCGCCGATCAACTGGGTGCCAGCGTGGTGGTGTGATGGTAGAACGAAGCGGC  
GTCGAAGCCTGTAAAGCGGCGGTGCACAATCTTCTCGCGCAACGCGTCAGTGGGCTGATCAATTAATATCCGC  
TGGATGACCAGGATGCCATTGCTGTGGAAGCTGCCTGCACTAATGTTCCGGCGTTATTTCTTGATGCTCTGAC  
CAGACACCCATCAACAGTATTATTTTCTCCCATGAAGACGGTACGCGACTGGGCGTGGAGCATCTGGTTCGCAT  
TGGGTACCAGCAAATCGCGCTGTTAGCGGGCCATTAAGTTCTGTCTCGGCGCGTCTGCGTCTGGCTGGCTG  
GCATAAATATCTCACTCGCAATCAAATTCAGCCGATAGCGGAACGGGAAGGCGACTGGAGTGCCATGTCCGG  
TTTTCAACAAACCATGCAAATGCTGAATGAGGGCATCGTTCCCACTGCGATGCTGGTTGCCAACGATCAGATG  
GCGCTGGGCGCAATGCGCGCCATTACCGAGTCCGGGCTGCGCGTTGGTGGCGGATATCTCGGTAGTGGGATACG  
ACGATACCGAAGACAGCTCATGTTATATCCCGCCGTTAACACCATCAAACAGGATTTTCGCCTGCTGGGGCA  
AACCAGCGTGGACCGCTTGTGCAACTCTCTCAGGGCCAGGCGGTGAAGGGCAATCAGCTGTTGCCGCTCTCA  
CTGGTGA AAAAGAAAAACCCTGGCGCCAATACGCAAACCGCCTCTCCCCGCGGTTGGCCGATTCATTAA  
TGCAGCTGGCACGACAGGTTTTCCCGACTGGAAAGCGGGCAGTGAGCGCAACGCAATTAATGTAAGTTAGCGC  
GAATTGATCTGGTTTACAGCTTATCATCGACTGCACGGTGCACCAATGCTTCTGGCGTCAGGCAGCCATCGG  
AAGCTGTGGTATGGCTGTGAGGTGCTAAATCACTGCATAATTCGTGTGCTCAAGGCGCACTCCCCTTCTGG  
ATAATGTTTTTTCGCGGACATCATAACGGTTCTGGCAAATATTCTGAAATGAGCTGTTGACAATTAATCATCC  
GGCTCGTATAATGTGTGGAATTGTGAGCGGATAACAATTTACACAGGAAAGGTACCATGAGTGTATTTAGCA

AAGAACAAGTTCAGGATATGTATGCGTTGACCCCGATGCAAGAGGGGATGCTGTTTTACGCCTTGCTCGATCA  
AGAGCACAACCTCGCATCTGGTACAGATGTCGATTTTCGTTGCAGGGCGATCTTGACGTTGGGCTATTTACGGAT  
AGCCTGCATGTGCTGGTAGAGAGATACGATGTATTCCGCACGTTGTTTCTCTATGAAAAGCTGAAGCAGCCTT  
TGCAAGTTGCTTGAAGCAACGGCCTATTCCGATCGAATTTTACGACTTGTCTGCCTGCGACGAGTCCGAGAA  
ACAACCTTCGTATACGCAATACAAAAGGGCGGATCAGGAGCGGACGTTTCATCTGGCAAAAGACCCGTTGAT  
GCGGGTCGCCCTTTTCCAAATGTCCAGCAGACTACCAGGTCATCTGGAGCTTTCATCACATCCTCATGGACG  
GCTGGTGCCTCAGCATTATTTTTGATGACTTGGCTTGCATCTACTTGTCTTGC AAAACAAGACGGCACTCTCC  
CTGGAGCCCGTACAGCCATACAGTCGCTTTATCAACTGGCTGGAAAAACAATAAACAGGCCGCTCTCAACT  
ATTGGAGCGACTATCTGGAAGCCTATGAACAAAAGACTACCTTGCCGAAGAAGGAAGCTGCCTTCGCCAAAG  
CATTTCAACCAACCCAATACCGCTTTTCGCTGAACCGCACCTTGACCAAGCAGCTCGGGACCATCGCCAGTCA  
AAATCAAGTGACGCTATCGACGGTGATTCAAACGATCTGGGGAGTTCTCCTGCAAAAATACAATGCGGCCCAT  
GATGTGCTGTTTCGGCTCTGTTGTATCCGGACGCCCTACAGACATCGTCGGAATCGACAAAATGGTTGGCTTGT  
TATCAATACGATTCCATTCCGGGTGCAAGCGAAAGCTGGTCAAACGTTTCCGAGCTGTTGCAAGCTGTGCAC  
AAAAGAACTTTCGAATCACAGCCGATGAGCACGTGCCTTTGTACGACATTCAAACCTCAGTCCGCTTGAAGC  
AGGAGCTGATTGACCACCTGCTGGTCATCGAAAATTACCCGCTGGTAGAGGCTTTCAGAAAAAAGCATTGAA  
CCAGCAGATCGGCTTACGATTACTGCTGTGAAATGTTTCGAGCCGACCAATTACGACTTGACTGTCATGGTG  
ATGCCAAAAGAAGAGCTTGCTTCCGTTTTGACTACAATGCGGCTCTGTTTGACGAACAGGTCGTGCAAAAAC  
TGGCGGGGCACCTCCAACAGATCGCGGATTGCGTGGCAAACAATTCCGGGAGTCGAGCTTTCGCCAGATTCCGTT  
GCTGACAGAAGCAGAAAAGTAGCCAGCTGTTGGCAAAGCGTACGGAAACAGCGGCTGACTATCCTGCCGCAAC  
CATGCACGAGCTGTTTTTCGCGGCAGGCAGAAAAACGCCTGAGCAAGTGGCGGTAGTCTTCGCGGATCAGCA  
CCTGACGTATCGGGAGCTGGATGAAAAATCCAATCAGCTCGCCCGCTTTTTGCGCAAAAAGGCATTGGCACG  
GGCAGTCTTGTGCGCACGCTGCTGGATCGCTCGCTGGACATGATCGTCGGAATCCTCGGCGTCTTGAAGGCAG  
GCGGCGCATTGTGCCGATCGACCCGGAGTTGCCTGCCGAACGAATCGCTTACATGCTGACGCATAGCAGAGT  
TCCATTGGTTCGTGACGCAAAATCATTGCGGGCAAAAAGTGACCACGCCTACAGAAAACAATTGACATCAACAC  
AGCGGTGATCGGGGAAGAGAGCCGCGCCCTATCGAATCGCTCAATCAGCCGCATGACTTGTTTTACATCATC  
TATACGTCCGGAACGACAGGGCAACCGAAAGGCGTCACTGCTGGAGCATCGCAACATGGCGAACCTGATGCAT  
TTTACGTTTGATCAGACGAACATCGCTTTTCATGAAAAAGTGTTCAGTATAACCACGTGCAGCTTTGATGTTG  
CTACCAGGAAATTTTCTCCAGCTGCTATCCGGGGGCCAGCTCTACCTGATCACGAACGAGCTGAGACGGCAT  
GTGGAAGCTGTTTGTCTTTCATCCAGGAAAAGCAGATCAGCATTGTCTCTCCCGGTGCTCTTCTGAAATT  
TATTTTTAACGAACAAGACTACGCGCAAAGCTTCCCGCTTGTGTCAAACATATCATCACGGCCGGGGAACAA  
CTCGTCGTACACACGAGCTGCAAAAAGTATCTGCGCCAGCATCGCGTATTTTTGCACAATCACTACGGCCCGT  
CGGAGACGCATGTGGTGACGACATGCACGATGGACCCGGGACAGGCGATACCAGAGCTGCCGCCCATCGGAA  
AGCCGATCAGCAACACAGGCATTTACATTTTGGATGAAGGGCTGCAATTGAAGCCGGAGGGGATCGTCGGGG  
AGTTGTACATTTCCGGCGCAAACGTAGGAAGAGGGTATTTGCACCAGCCGGAGCTGACCGCGGAGAAGTTTCT  
CGACAATCCGTATCAGCCAGGCGAAAGAATGTACCGAACGGGTGATCTGGCGGTTGTTGCGGATGGCCA  
GCTCGAATTTTTGGGCCGAATCGACCATCAGGTA AAAATCAGGGGCCATCGCATCGAGCTGGGAGAGATCGA  
ATCGCGCTGCTCAACCATCCCGCCATCAAGGAAGCGGTGGTTATCGACCGAGCAGACGAGACAGGCGGCAA  
GTTTTGTGCGCCTATGTCGTCTGCAAAAAGCGCTCAGCGACGAAGAGATGCGGGCATACTTGGCGCAAGCG  
TTGCCGGAGTATATGATCCCTTCTTTTTCGTGACGCTGGAGCGGATTCCAGTCACGCCGAACGAAAAACAG  
ACAGGCGAGCTTTGCCGAAGCCGGAAGGAAGTGCCAAGACGAAAGCGGATTACGTGCCCCGACGACTGAGC  
TGGAACAAAAGCTGGTTCGCGATTTGGGAGCAAATCTTGGCGTGTCCCGATCGGCATTACAGGATCATTTTT  
CACGCTGGGCGGCCATTCGTTAAAAGCGATTACGCTCATTTCCCGCATCCAAAAGGAATGCCAGGCGGATGTC  
CCGCTGCGCGTCTGTTTGTAGCAACCGACGATTCAAGCGCTGGCAGCGTATGTGGAAGGCGGGGAGGAAAGC  
GCGTATCTCGCCATTTCCAGGCCGAGCCGCAAGCGTATTATCCCGTATCGTCTGCGCAAAAACGCATGCTCA  
TCTTAAACCAGCTCGATCCGCACAGCACGGTTTACAACCTGCCTGTGCGGATGATCCTCGAAGGAACGCTGGA  
TAAAGCTCGGCTGGAGCACGCCATTTCAAACCTGGTGGCTCGCCATGAGTCGTTGCGCACGTCGTTTCATACG  
ATCAACGGGGAGCCAGTTTCCCGCATCCATGAGCAAGGCCACTTGCCGATTGTTTACTTGGAAACGGCGGAAG  
AGCAAGTGAACGAGGTCATTTTGGGGTTCATGCAGCCGTTTGTACTGGTAACAGCTCCGCTATGCCGGGTTGG  
CTTGGTGAAGCTCGCAGAGAACCCTCACGTCTGATCATCGACATGCACCATATCATTTCGGACGGAGTCTCT  
TCTCAGCTCATCCTGAATGACTTTTCCGTTTGTATCAAAAACAAGCTTTGCCAGAGCAGCGCATTCACTATAA  
AGACTTCGCCGTTTGGGAAAAAGCGTGGACACAAAACGACCATTACAAAAACAGGAAAAATATTGGCTCGA  
TCGATTTGCGGGCGAAATCCCGTTTTGAACCTGCCGATGGATTACCCGCGCCAGCTGTTCAAAGCTTTGAG  
GGCGAACGTTATTTGTTCCGCACAGAAAAACAGTTGTTGGAAAGTTTGCAGGACGTAGCCAAAAGACAGG  
ACGACCTTGTACATGGTGTCTTCTCGCAGCCTATCATGTGCTTTTCAAATACTCCGGCAGGATGACGTGAT  
GATCGGCACCGTACTGCCGGCAGGGTGCAACCCGATACGGAGAGCATGACGGGGATGTTTCGTC AACACGCT  
GGCGATGCGCAATCAGTCTGCGCCGACCAAAACGTTCCGGCAATTTTTGCTGGAGGTA AAAAGACAACGCT  
GGCCGTTTTGAACACGGGCAATATCCGTTTGAAGAGCTTGTGCAAAAAGTTGGCGATCCAGCGAAACCGGAGC  
CGAAACCCGCTGTTTCGACACCTTGTTCATTTTGC AAAACATGGATGCCGACCTGATCGAGCTGGATGGACTGA

CCGTGACGCCTTATGTGCCAGAGGGGGAAGTCGCCAAGTTCGATCTGTCGCTGGAAGCAAGCGAAAACCAGG  
CGGGACTTTCCTTCTGCTTCGAATTTTGACCAAGCTGTTTCGCACGCGAGACGATCGAGCGCATGTCGCTTCAT  
TACTTGCAAATTTTGACGGCAGTCAGCGCAAACACGGAGCAGGAGCTGGCGCAAATCGAGATGCTGACTGCG  
CATGAGAAGCAGGAGCTGCTCGTTCACCTCAACGACACGGCCGCCCTGTATCCAGCGGAGAGCACGCTGTGCG  
AGCTGTTTGAAGATCAGGCACAGAAAACCTCTGAGCAAACCGCCGTCGTCTTCGGTGACAAAACGACTGACGT  
ACCGGAACTGAACGAGCGGGCCAACCAGCTCGCGCACACTTTGCGGGCAAAGGGCGTGACGGCTGAGCAA  
GCGTAGGGATCATGGCGCAAAGATCGCTCGAGATGGCGATCGGAATCATCGCTATTCTCAAAGCGGGCGGGG  
CGTATGTGCCGATCGATCCGGATTATCCGAATGAGCGGATTGCTTACATGCTGGAAGATTGCGAAGCCCGTCT  
GGTGCTGACCCAGCAGCAGCTCGCCGAAAAGATGACCGCAAACGTGGAATGCCTGTATCTGGATGAGGAGGG  
CAGCTACTCGCTCAGACGGAAAACATCGAGCCGATCCATACCGCTGCTGATCTCGCTTACATCATCTACACA  
TCCGGTACGACAGGCAGGCCAAAAGGGCGTCATGGTAGAGCATCGGGGAATCGTCAACAGTGTGACGTGGAAC  
AGGGACGAGTTTGCCTTTCTGTCCGGGACAGTGGAACGCTGTGCTATCTTTGCTTCGATGCCTTTGCCCT  
TACTTTCTTACGTTGATTGTATCAGGCTCCACGGTCGTCTGATGCCGATCACGAAGCCAAAGATCCGATCG  
CGCTACGCAACCTGATTGCCGCTTGGGAATGCAGCTACGTGCTTTTCGTGCCAGTATGTTCCAGGCGATATTG  
GAGTGCAGCACTCCGGCAGACATCCGCTCCATCCAGGCAGTCGCGCTCGGGGGCGAAAAGCTGTGCGCGAAG  
CTTGTTAGCTGTGCAAAGCGATGCATCCGCAGATGAGCGTGATGAATGCATACGGCCCGACGGAGAGCAGC  
GTCATTGCCACCTACCTGCGAGATACACAGCCAGATCAGCCGATACCATCGGGCGGCCGATTGCCAACCCG  
CCATTTACATCGTAGACCAGCACCATCAACTGCTGCCTGTGCGGGTGGTAGGGGAAATCTGCATCGGCGGTCA  
CGGCTTGGCGCGGGGCTATTGGAAAAAGCCGGAGCTTACTGCGGAGAAAATTCGTGGCCAATCCAGCTGTTCCG  
GGAGAGCGCATGTACAAAACAGGCGATCTGGGCAGATGGCTCCACGACGGCACGATTGATTTTATAGGCCGC  
GTCGATGACCAAATCAAGGTGAGAGGATACCGGATTGAGGTGCGGGGAGATTGAAGCGGTTTTGCTCGCTTAC  
GATCAGACGAATGAAGCTATCGTCGTCGCTTATCAGGACGATCGCGGCGATTCCATCTGGCTGCGTATGTCA  
CGGGAAAACGGCGATAGAGGAATCCGAGCTTCGCGCGCATCTGTTGCGAGAGCTTCCGGCCTACATGGTGC  
CGACCTACCTGATTCAACTGGACGCTTTCCCGCTCACGCCAAACGGCAAGGTCGACCGCAAGGCACTGCCCAA  
GCCGGAAGGAAAGCCTGCAACAGGAGCAGCTTATGTGCGACCCGCTACAGAAGTGGAGGGCAAGCTGGTCCG  
CATTTGGGAGAATGCGCTGGGGATTTCCGGCGTCGGGGTGTGGATCACTTTTTGAGCTGGGCGGTCATTCT  
TGAAAGCGATGACGGTTGTGGCGCAAGTGCATCGCGAGTTTCAAATCGACCTTTTGCTGAAGCAGTTTTTGC  
AGCGCAAACCATCCGGGACTTGGCCCGCTTATCGAACATAGCGAACAGGCAGCCGGCGCCGCCATTCAACC  
GGCAGAGCCGCAAGCGTATTATCCGGTATCTTCTGCTCAGCAGCGGATGACTTGTCCATCAGCTTGAAGGT  
GCCGGAATCAGCTACAACACACCGGGCATCATGCTGGAAGGCAAGCTCGATCGCGAGCAATTGGCGAAT  
GCGCTGCAAGCGTTGGTAGATCGTCACGATATTTTGGCGACGCTTTTTGAGATGGTCCGAGACGAGCTGGTGC  
AAAAAATTCATGACCCGCTGGCCGTGAACATGGAGTATGTGACGGCAGAAGAGCAGCAGATCGATGACCTTT  
TCCACGCGTTCGTCCGTCCGTTTATCTTGTGCCGCCATTGCTCCGCATGAGCCTGGTGAAACTCGCGGAT  
GAGCGTCACCTGCTCCTGTACGACATGCACCATATTGCTGCCGATGCCGCATCGATCACGATCCTGTTTCGATG  
AACTGGCTGAATTGTACCAGGGAAGAGAACTGCCGGAATGCGCATCCAGTACAAAGATTTTGCTGTCTGGCA  
AAAAGCCTTGATGAGTCGGATGCCTTCAAGCAGCAGGAAGCGTATTGGCTGAGCACGTTTCGCTGGAAATATC  
ACCGCTGTGATGTGCCGACAGATTTTCCGCGCCCAGCCGTGAAAAGTTTTGCAGGGGGGCAAGTACCCTGT  
CCATGGACCAAGAGCTGCTCAGTGCTTTGCACGAGTTGGCTGCGCATAACGAATACGACGCTGTTTATGGTTTT  
GCTGGCCGCTACAACGTGCTGCTCGCAAAATACGCTGGGCAAGACGACATCATCGTGGGAACGCCGATCTCC  
GGCAGGTCACGCGCCGAGCTTGGCCTGTGTCGCGCATGTTTCGTCATACGCTGGCGATCCGCAACAAACCGA  
CCGCCGAGAAGACATTCAAGCAGTTTTTGCAGGAGGTCAAGCAAACCGGCTCGATGCTTTCGACCACCAGG  
ACTACCCGTTTGAAGCCTTGTGGAAAAGCTGGGCATTCCGCGCGATCCGGGGCGCAATCCGCTGTTTGCAC  
CATGTTTCATCCTGCAAAACGATGAGTTGCACGCAAAAACGCTGGATCAGCTCGTCTATCGCCCTTATGAATCG  
GACAGCGCGCTTGACGTGGCGAAATTCGACTTGTGCTTCCATCTGACCGAGCGGGAAACCGACCTGTTCTTGC  
GCCTGGAATACTGCACCAAGCTGTTCAAGCAACAAACGGTAGAACGAATGGCGCACCCTTCTTCAAATTTT  
GCGAGCGGTCACGGCCAATCCGGAAAATGAATTGCAAGAGATCGAGATGCTGACAGCAGCAGAAAAGCAAA  
TGCTGCTGGTGGCGTTCAACGATACGCACAGAGAATACCGGGCAGATCAAACAATCCAGCAACTTTTTGAAGA  
GCTGGCGGAAAAAATGCCTGAGCACACGGCGCTCGTATTGCAAGAAAAGCGCATGTCGTTCCGGGAGCTCAA  
TGAAAGAGCGAACCAGCTCGCAGCCGTTTTGCGGGAAAAGGAGTCGGGCCAGCGCAGATCGTCGCTTTGCT  
GGTAGAGCGTTCCGCCGAGATGGTCATTGCCACGCTTCCACGTTAAAAGCGGGCGGCGCCTTTTTGCCCGTC  
GATCCTGATTATCCGGAAGAGCGAATCCGCTACATGCTGGAGGACAGCCAGGCAAAACTGGTGGTGACCCAT  
GCGCACTTGTGCACAAAAGTGAGCAGTCAGTCCGAAGTCGTTGATGTGGATGACCCTGGAAGCTACGCAACA  
CAGACAGACAACCTGCCGTGCGCAAACACACCGTCTGATTTGGCTTATATCATTACACGTCCGGTACGACGG  
GCAAGCCAAAAGGCGTCATGCTGGAGCACAAGGGGTAGCGAATCTGCAAGCGGATTTGCCATCATCTAG  
GCGTACGCCGCAAGATCGGGCAGGGCATTGTCACGATCTCGTTTACGCATCGGTTGAGGATATGTTTGG  
CCCGTTGCTGTGCGGAGCGACCTTGTACGTCTTGTCCCGAGACGTCATCAACGATTTTCAAAGATTCCGCCAAT  
ACGTTCCGCGATAACCGGATCACCTTCTCACTTTGCCGCCGACGTACGCGATTTATCTGGAGCCGGAGCAGGT  
GCCGTCGTTACGCACCCCTGATTACAGCCGGATCGGCTTCTCCGTTGCATTGGTGGATAAATGAAAAGAAAA



GTCACCTATGTCAATGGATACGGCCCAACAGAGAGCACCGTTTGC GCGGACACTGTGGAAAGCCAAACCGGAT  
GAGCCAGTCGAAACGATCACGATTGGCAAACCGATTCCAGAACACCAAGCTGTACATCGTGGATGACCAGTTG  
CAGTTGAAAGCGCCGGGCAGATGGGAGAAGTGTGCATCAGCGGCTTGTGCTGGCGAGAGGCTATTGGAAT  
CGTCCAGAGCTGACCGCCGAGAAGTTCGTCGACAACCCGTTTGTGCCAGGAACAAAGATGTACCGGACAGGC  
GACCTGGCAAGATGGCTGCCAGATGGAAGTATCGAGTATCTGGGCAGAATCGATCACCAAGTGAATAATTCGC  
GGACATCGTGTGGAAGTCCGGCGAAGTGAAAAGCGTGTCTGCGGTATGACACGGTCAAAGAGGGCGGCCGCC  
ATCACACATGAGGACGACCGCGGCCAAGCTTACTTGTGCGCCTACTACGTAGCGGAGGGAGAAGCCACGCCT  
GCGCAACTTCGAGCCTATATGGAAAACGAGTTGCCGAAGTACATGGTTCCCGCCTTCTTTATCCAGTTGGAAA  
AGATGCCGCTGACACCGAATGACAAGATTGACCGAAAAGCGCTGCCGAAGCCGAACCAGGAGGAGAACCGG  
ACTGAGCAATATGCAGCGCCGCAAACCGAGCTGGAACAGTTGCTGGCTGGCATCTGGGCAGATGTACTGGGG  
ATCAAGCAAGTCGGGACGCAAGACAATTCTTTGAATTGGGCGGGCGATTTCGATTAAGCGATCCAGGTATCCA  
CCCGCCTGAATGCGTCAGGCTGGACGCTTGCATGAAAGAACTGTTCCAGTACCCGACGATTGAAGAAGCTGC  
TCTGCGCGTCATCCCGAACAGCCGAGAGAGCGAGCAGGGTGTCTAGAAAGGCGAGATTGCCTTGACACCGAT  
CCAGAAATGGTTCTTCGCGAACAACCTTACCGGATCGTCAACATTGGAATCAGGCTGTCTGCTGTTTCGCGAG  
GACGGCTTTGACGAGGGACTCGTGCAGCAAGCGTTCCAGCAAATCGTTCGAGCATCACGATGCGCTGCGCATG  
GTCTACAAGCAAGAGGACGGGGCGATCAAGCAAATCAACCGCGGGCTGACCGACGAGCGCTTCCGTTTCTAC  
TCTTATGACTTGAAAAATCACGCGAACAGCGAAGCTCGCATCCTGGAGCTGTCTGATCAGATCCAGAGCAGCA  
TCGATTTGGAGCACGGCCACTCGTTCACGTGGCTCTGTTCCGCACAAAAGACGGGGATCATTGCTGGTTCGC  
GATCCACCATCTTGTGCTGGATGGCGTCTCCTGGCGCATTTTGTTCGAAGATTTTTCTCAGCCTACTCGCAGG  
CTCTCCATCAGCAGGAGATCGTCTTGCCGAAAAGACGGACTCCTCAAAGACTGGGCGGGCTCAATTGCAAAA  
GTACGCGGACAGCGACGAGCTGTTGCGGGAAGTGGCATATTGGCACAACCTGGGAGACTACAACGACGACTGC  
GGCACTGCCAACAGATTTTGTACGGCAGATCGCAAGCAAAAACATACGCGGACACTGTCTGCTTCGCGTTGACA  
GTCCCGCAGACAGAAAACCTTTTGCCTCACGTTTATCATGCCTATCACACAGAGATGAACGACCTGCTGCTGA  
CAGCGCTCGGCTTGGCCGTAAGAAAGACTGGGCACATACGAATGGCGTCTGTCATCAATCTGGAAGGCCATGGGC  
GCGAAGACATCCAGAACGAAAATGAACGTCACGCGCACGATTGGCTGGTTCACTTCGCAATATCCGGTGGTGTCT  
CGACATGGAAAAGCCGAGGACTTGCCGTACCAGATCAAGCAAAACCAAGAAAACCTTGCAGCGGATTCCGAA  
AAAAGGGATCGGCTACGAGATTTTGCACGCTGACGACAAGCCAGTTGCAGCCGCCATTAGCCTTACGCTG  
CGGCCGAAAATCAGCTTTAACTATCTCGGTCAATTCGAGTCCGACGGAAAAACAGGCGGGTTTACATTCTCGC  
CGCTCGGAACAGGGCAGTTGTTTACGCCGGAATCGGAGCGAGTGTCTCTGCTGGACATTTCCGCCATGATCGA  
GGACGGCGAGCTGCGGATCAGCGTGGGGTACAGCCGTCTCCAATATGAGGAAAAAACGATTGCCAGCCTGGC  
AGACAGCTACCGGAAGCACTTGTAGGCATCATCGAGCATTGCATGGCAAAAAGAAGAAGGCGAGTACACCCC  
GAGCGACCTGGGGGATGAAGAGCTGTCCATGGAGGAGCTGGAAAACATCCTGGAATGGATTGGATCCAGATC  
TCATCACCATCACCATCACGCTTAAT

## References

- (1) Kries, H.; Wachtel, R.; Pabst, A.; Wanner, B.; Niquille, D.; Hilvert, D. Reprogramming nonribosomal peptide synthetases for "clickable" amino acids. *Angew. Chem. Int. Ed.* **2014**, *53*, 10105-10108.
- (2) Gruenewald, S.; Mootz, H. D.; Stehmeier, P.; Stachelhaus, T. In vivo production of artificial nonribosomal peptide products in the heterologous host *Escherichia coli*. *Appl. Environ. Microbiol.* **2004**, *70*, 3282-3291.
- (3) Niquille, D. L.; Hansen, D. A.; Mori, T.; Fercher, D.; Kries, H.; Hilvert, D. Nonribosomal biosynthesis of backbone-modified peptides. *Nat. Chem.* **2018**, *10*, 282-287.
- (4) Niquille, D. L.; Folger, I. B.; Basler, S.; Hilvert, D. Biosynthetic functionalization of nonribosomal peptides. *J. Am. Chem. Soc.* **2021**, *143*, 2736-2740.
- (5) Boder, E. T.; Wittrup, K. D. Yeast surface display for directed evolution of protein expression, affinity, and stability. *Methods Enzymol.* **2000**, *328*, 430-444.
- (6) Blomberg, R. Optimizing artificial enzymes with directed evolution, ETH Zurich, 2011.
- (7) Benatuil, L.; Perez, J. M.; Belk, J.; Hsieh, C. M. An improved yeast transformation method for the generation of very large human antibody libraries. *Protein Eng. Des. Sel.* **2010**, *23*, 155-159.
- (8) Reuter, K. Crystal structure of the surfactin synthetase-activating enzyme Sfp: a prototype of the 4'-phosphopantetheinyl transferase superfamily. *EMBO J.* **1999**, *18*, 6823-6831.
- (9) Lambalot, R. H.; Gehring, A. M.; Flugel, R. S.; Zuber, P.; LaCelle, M.; Marahiel, M. A.; Reid, R.; Khosla, C.; Walsh, C. T. A new enzyme superfamily - The phosphopantetheinyl transferases. *Chem. Biol.* **1996**, *3*, 923-936.
- (10) Studier, F. W. Protein production by auto-induction in high density shaking cultures. *Protein Expr. Purif.* **2005**, *41*, 207-234.
- (11) Tanovic, A.; Samel, S. A.; Essen, L.-O.; Marahiel, M. A. Crystal structure of the termination module of a nonribosomal peptide synthetase. *Science* **2008**, *321*, 659-663.
- (12) Samel, S. A.; Schoenafinger, G.; Knappe, T. A.; Marahiel, M. A.; Essen, L. O. Structural and Functional Insights into a Peptide Bond-Forming Bidomain from a Nonribosomal Peptide Synthetase. *Structure* **2007**, *15*, 781-792.
- (13) Stachelhaus, T.; Mootz, H. D.; Marahiel, M. A. The specificity-conferring code of adenylation domains in nonribosomal peptide synthetases. *Chem. Biol.* **1999**, *6*, 493-505.
- (14) Rausch, C.; Weber, T.; Kohlbacher, O.; Wohlleben, W.; Huson, D. H. Specificity Prediction of Adenylation Domains in Nonribosomal Peptide Synthetases (NRPS) Using Transductive Support Vector Machines (TSVMs). *Nucleic Acids Res.* **2005**, *33*, 5799-5808.
